# Supplementary material for: Insights about the ability of folate based supramolecular gels to act as targeted therapeutic agents
Source: Royal Society of Chemistry journal article supplement (doi:10.1039/d3tb01389h), 2023-01-01
Supplement: d3tb01389h1.pdf [file d3tb01389h1.pdf]

**Electronic Supplementary Information**  
**Insights about the Ability of Folate based Supramolecular Gels to Act as**  
**Targeted Therapeutic Agents**

*Carla Rizzo<sup>a,‡</sup> Patrizia Cancemi,<sup>b,‡</sup> Miriam Buttacavoli,<sup>b</sup> Gianluca Di Cara,<sup>b</sup> Cesare  
D'Amico,<sup>b</sup> Floriana Billeci,<sup>a,c</sup> Salvatore Marullo,<sup>a</sup>  
Francesca D'Anna<sup>a\*</sup>*

<sup>a</sup>*Università degli Studi di Palermo, Dipartimento STEBICEF, Sezione di Chimica, Viale delle  
Scienze Ed. 17, 90128 Palermo (Italy)*

<sup>b</sup>*Università degli Studi di Palermo, Dipartimento STEBICEF, Sezione di Biologia Cellulare, Viale  
delle Scienze Ed. 16, 90128 Palermo (Italy)*

<sup>c</sup>*Until March 2022*

<sup>‡</sup>These authors contributed equally

\*Corresponding author: Prof. F. D'Anna. E-mail: [francesca.danna@unipa.it](mailto:francesca.danna@unipa.it)

|                                                                                                                                                                                                                                                                                                                                        |                  |
|----------------------------------------------------------------------------------------------------------------------------------------------------------------------------------------------------------------------------------------------------------------------------------------------------------------------------------------|------------------|
| <b>Figure S1.</b> UV spectra of $[C_1C_{12}Im]_2[Folate]$ in solution at $10^{-4}$ M.                                                                                                                                                                                                                                                  | pag. S3          |
| <b>Figure S2.</b> UV spectra of organic salts (0.0001 M), in PBS solution, in the presence of increasing amount of BSA (2 and 40 $\mu$ m).                                                                                                                                                                                             | pag. S3          |
| <b>Figure S3.</b> Fluorescence spectra of organic salts (0.0001 M), in PBS solution, in the presence of increasing amount of BSA (2 and 40 $\mu$ m).                                                                                                                                                                                   | pag. S4          |
| <b>Figure S4.</b> Fluorescence spectra of <b>a) <math>[Ch]_2[Folate]</math></b> and <b>c) <math>[C_{222}C_{12}]_2[Folate]</math></b> in PBS at variable concentrations; fluorescence intensity as function of solution concentration for <b>c) <math>[Ch]_2[Folate]</math></b> and <b>d) <math>[C_{222}C_{12}N]_2[Folate]</math></b> . | pag. S5          |
| <b>Figure S5.</b> <b>a)</b> Wavelength of fluorescence maxima of organic salts in PBS; <b>b)</b> critical aggregation concentration obtained from fluorescence intensity as function of salt concentration.                                                                                                                            | pag. S5          |
| <b>Figure S6.</b> Emission spectra of $[Folate]$ -based salt and 9,10-diphenylanthracene, in ethanol solution, at $2 \cdot 10^{-5}$ M.                                                                                                                                                                                                 | pag. S6          |
| <b>Figure S7.</b> Apparent hydrodynamic diameter distribution functions obtained in buffer and buffer/DMSO for $[C_1C_{12}Im]_2[Folate]$ from DLS experiments.                                                                                                                                                                         | Pag. S7-<br>S9   |
| <b>Figure S8.</b> Superimposed fluorescence spectra, in PBS solution ( $3 \cdot 10^{-5}$ M) and solid phase, for <b>a) <math>[Ch]_2[Folate]</math></b> and <b>b) <math>[C_{222}C_{12}N]_2[Folate]</math></b> .                                                                                                                         | pag. S10         |
| <b>Figure S9.</b> ATR-FTIR spectra of organic salts.                                                                                                                                                                                                                                                                                   | pag. S11         |
| <b>Figure S10.</b> Superimposed ATR-FTIR spectra of $[C_1C_{12}Im]_2[Folate]$ and corresponding gel phases.                                                                                                                                                                                                                            | pag. S12         |
| <b>Figure S11.</b> Strain and frequency sweeps of hydrogels formed by $[C_1C_{12}Im]_2[folate]$ , in PB and PB/DMSO at 6 wt % .                                                                                                                                                                                                        | pag. S13         |
| <b>Figure S12.</b> RLS Spectra of $[C_1C_{12}Im]_2[Folate]$ solution ( $2.6 \cdot 10^{-4}$ M) in <b>a) PB</b> and <b>PB/DMSO</b> and <b>b) TBS</b> and <b>TBS/DMSO</b> . $I_{RLS}$ at 450 nm, for different solutions at 450 nm, are displayed in Table 5.                                                                             | pag. S13         |
| <b>Figure S13.</b> RLS Spectra of $[C_1C_{12}Im]_2[Folate]$ gel at 6 wt % in <b>a) PB</b> and <b>PB/DMSO</b> and <b>b) TBS</b> and <b>TBS/DMSO</b> . $I_{RLS}$ at 470 nm are displayed in Table 5.                                                                                                                                     | pag. S14         |
| <b>Figure S14.</b> Fluorescence emission spectra of the hot solution and corresponding gel of $[C_1C_{12}Im]_2[Folate]$ at 6 wt %; <b>b)</b> Picture of $[C_1C_{12}Im]_2[Folate]$ gels irradiated at 365 nm.                                                                                                                           | pag. S15-<br>S16 |
| <b>Figure S15.</b> Sigmoidal cytotoxicity curves of treated MDA MB-231, MCF 7 and hTERT-RPE-1 cells for 24 h, obtained by plotting the cell percentage inhibition versus the logarithmic of salts concentration.                                                                                                                       | pag. S17         |
| <b>Figure S16.</b> Inverted-phase contrast micrographs of MDA-MB-231 (A) and MCF-7 (B) cells treated for 24h with 6 and 25 $\mu$ M of <b>Folic Acid</b> , $[C_{222}C_{12}N]_2[Folate]$ and $[C_1C_{12}Im]_2[Folate]$ . Magnification 100X                                                                                              | pag. S18-<br>S19 |
| $^1H$ NMR and $^{13}C$ NMR spectra of gelators.                                                                                                                                                                                                                                                                                        | pag. S20-<br>S24 |
| <b>Table S1.</b> UV-vis values of folate-salts ( $1 \cdot 10^{-4}$ M) solution in PBS in presence of BSA at 2 and 40 $\mu$ M.                                                                                                                                                                                                          | pag. S25         |
| <b>Table S2.</b> Fluorescence values of folate-salts ( $1 \cdot 10^{-5}$ M) solution in PBS in presence of BSA at 2 and 40 $\mu$ M.                                                                                                                                                                                                    | pag. S26         |
| <b>Table S3.</b> Apparent dynamic diameter ( $d_H$ ) and polydispersion index ( $PDI_{DLS}$ ) obtained from DLS measurements of $[C_1C_{12}Im]_2[Folate]$ in buffer and buffer/DMSO solution (0.0001 M).                                                                                                                               | pag. S26         |
| <b>Table S4.</b> Gelation tests.                                                                                                                                                                                                                                                                                                       | pag. S27         |
| <b>Table S5.</b> $I_{RLS}$ at 470 nm for $[C_1C_{12}Im]_2[Folate]$ gel phases formed in buffer and buffer/DMSO binary mixtures.                                                                                                                                                                                                        | pag. S27         |

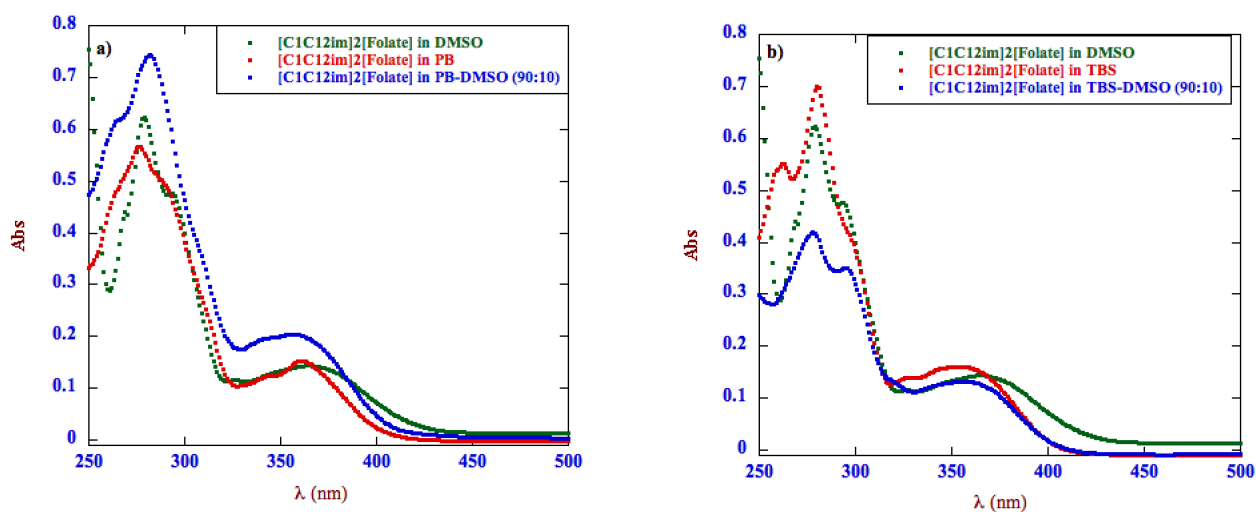

**Figure S1.** UV spectra of  $[C_1C_{12}Im]_2[Folate]$  in solution at  $10^{-4} M$ .

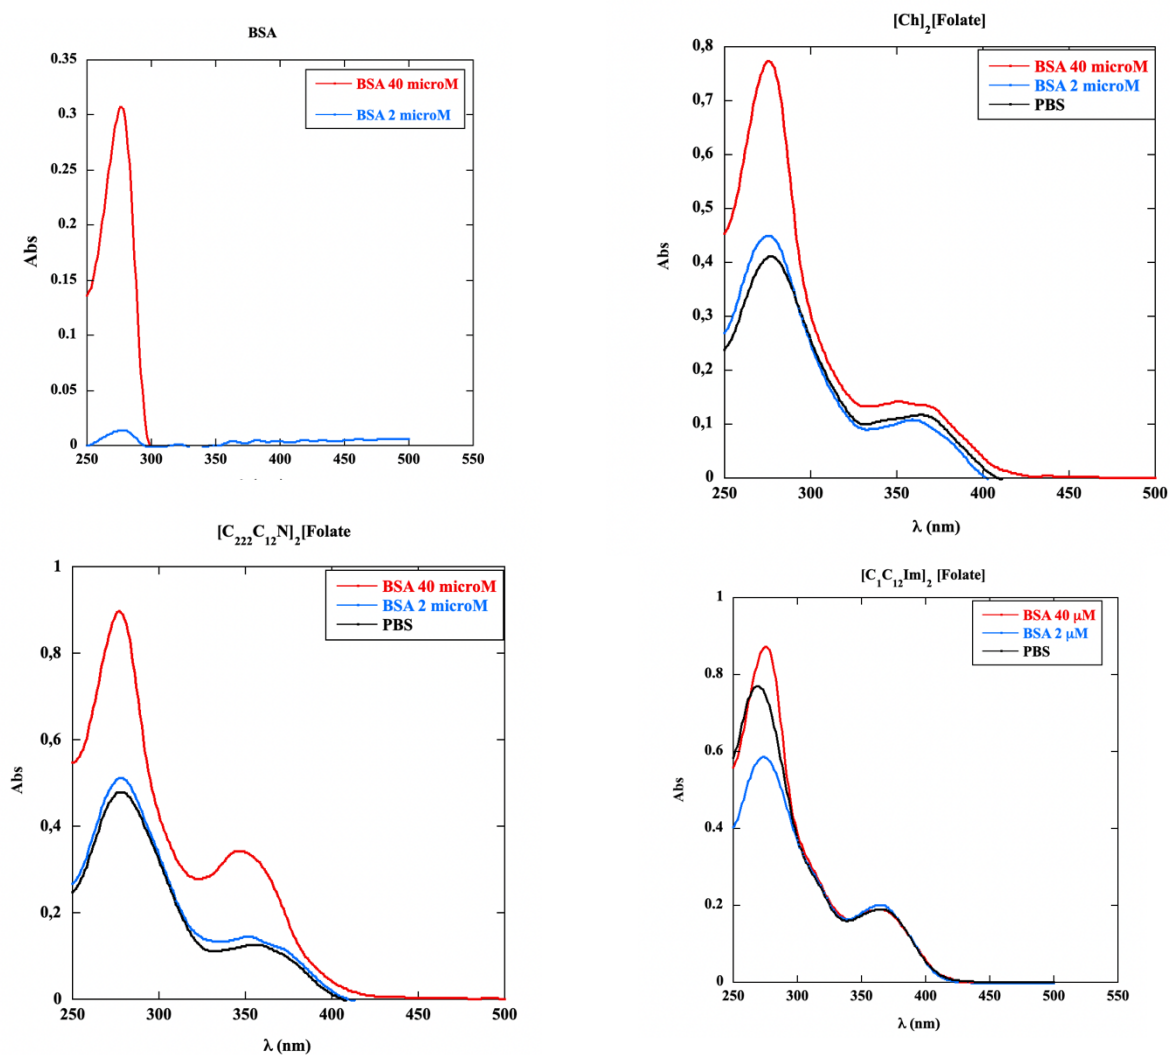

**Figure S2.** UV spectra of organic salts (0.0001 M), in PBS solution, in the presence of increasing amount of BSA (2 and 40  $\mu M$ ).

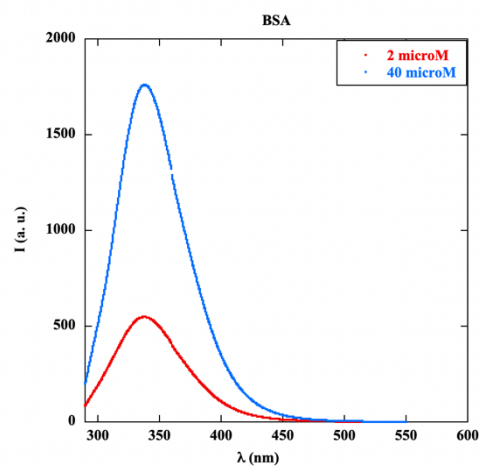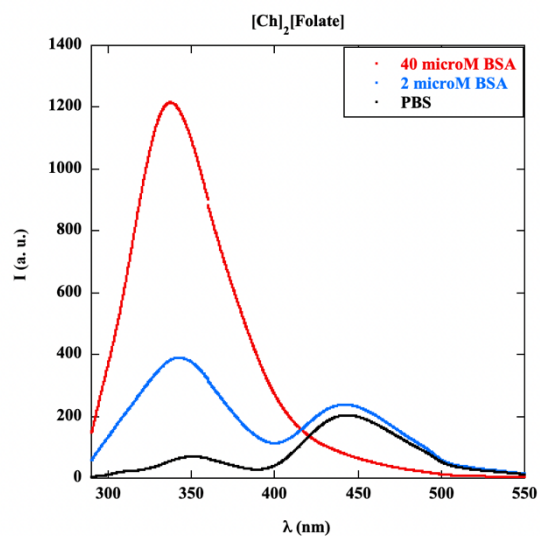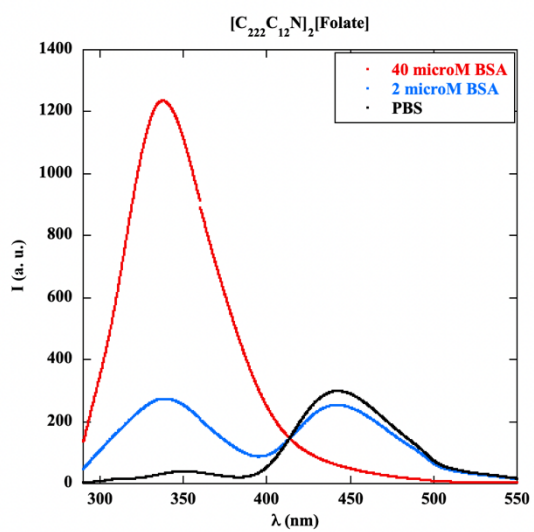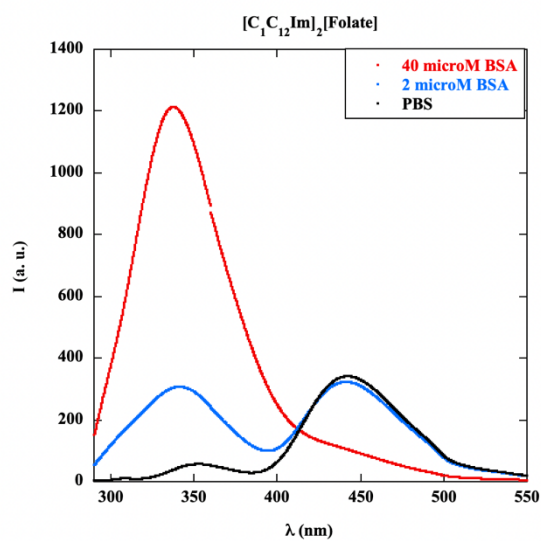

**Figure S3.** Fluorescence spectra of organic salts (0.0001 M), in PBS solution, in the presence of increasing amount of BSA (2 and 40  $\mu\text{M}$ ).



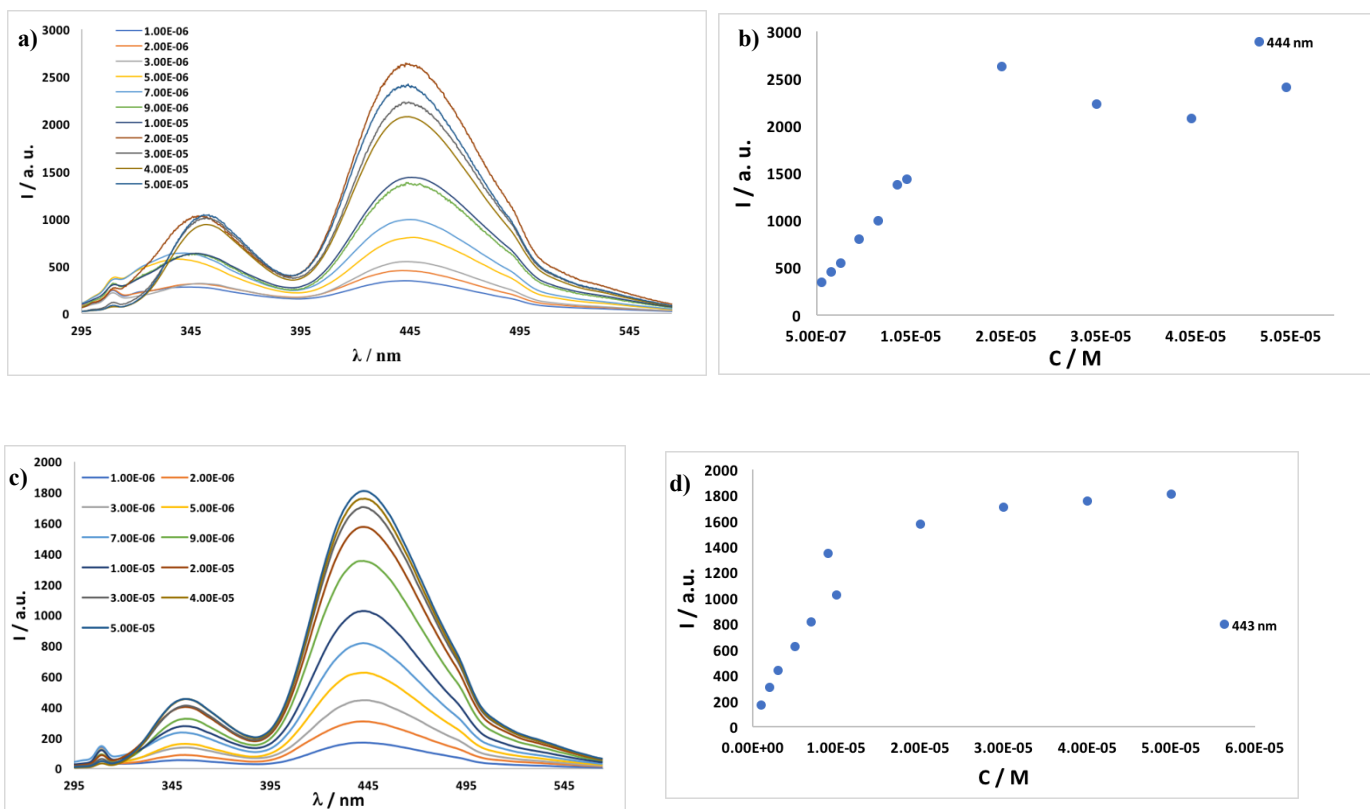

**Figure S4.** Fluorescence spectra of **a)**  $[\text{Ch}]_2[\text{Folate}]$  and **c)**  $[\text{C}_{222}\text{C}_{12}\text{N}]_2[\text{Folate}]$  in PBS at variable concentrations; fluorescence intensity as function of solution concentration for **c)**  $[\text{Ch}]_2[\text{Folate}]$  and **d)**  $[\text{C}_{222}\text{C}_{12}\text{N}]_2[\text{Folate}]$ .

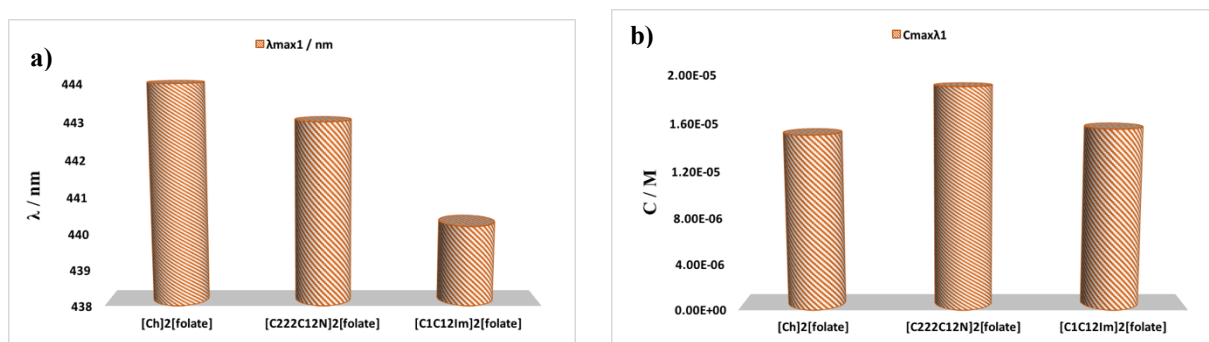

**Figure S5.** **a)** Wavelength of fluorescence maxima of organic salts in PBS; **b)** critical aggregation concentration obtained from fluorescence intensity as function of salt concentration.

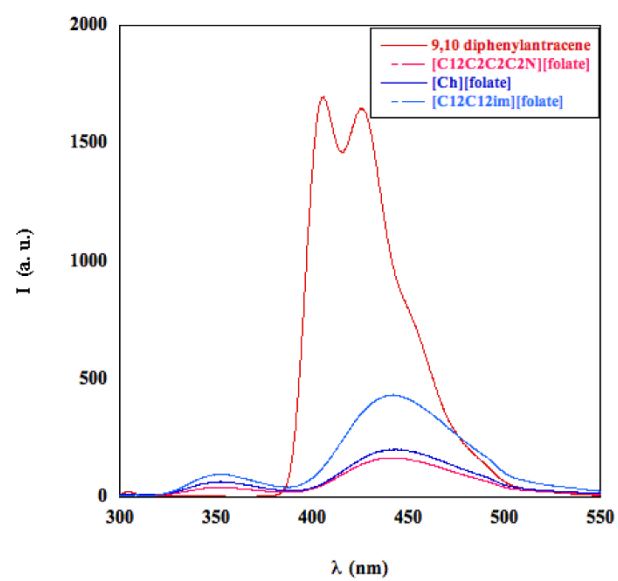

**Figure S6.** Emission spectra of [Folate]-based salt and 9,10-diphenylanthracene, in ethanol solution, at  $2 \cdot 10^{-5}$  M.

**[C<sub>1</sub>C<sub>12</sub>Im]<sub>2</sub>[Folate] in PB**

**Z-Average (d.nm): 650,7**

**Pdl: 0,545**

**Intercept: 0,876**

|                | Size (d.nm): | % Intensity: | St Dev (d.nm): |
|----------------|--------------|--------------|----------------|
| <b>Peak 1:</b> | 352,0        | 100,0        | 56,90          |
| <b>Peak 2:</b> | 0,000        | 0,0          | 0,000          |
| <b>Peak 3:</b> | 0,000        | 0,0          | 0,000          |

**Result quality : Refer to quality report**

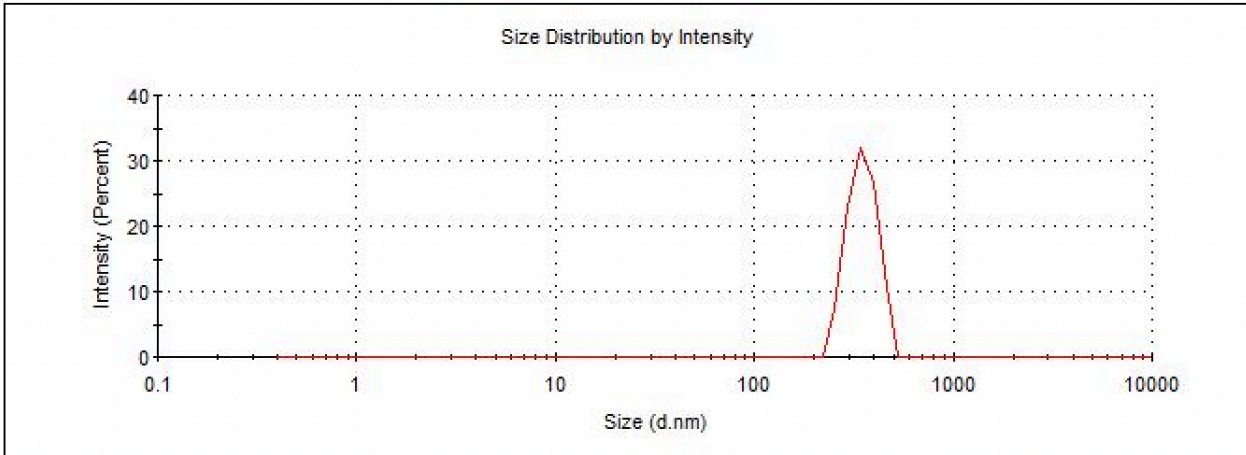

**[C<sub>1</sub>C<sub>12</sub>Im]<sub>2</sub>[Folate] in PB/DMSO**

**Z-Average (d.nm): 748,5**

**Pdl: 0,575**

**Intercept: 0,862**

|                | Size (d.nm): | % Intensity: | St Dev (d.nm): |
|----------------|--------------|--------------|----------------|
| <b>Peak 1:</b> | 413,7        | 100,0        | 66,82          |
| <b>Peak 2:</b> | 0,000        | 0,0          | 0,000          |
| <b>Peak 3:</b> | 0,000        | 0,0          | 0,000          |

**Result quality : Refer to quality report**

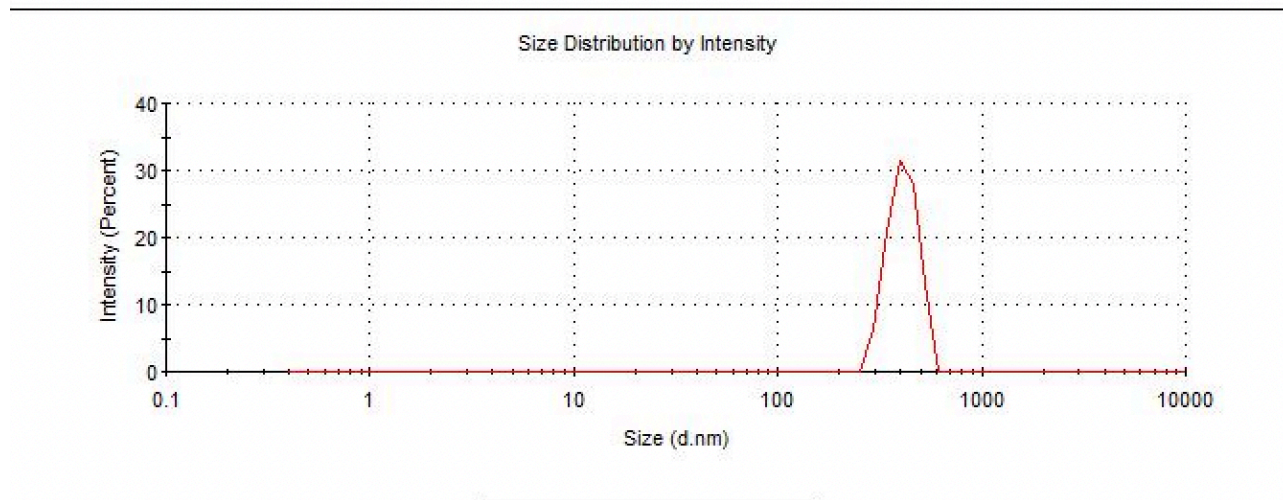

**[C<sub>1</sub>C<sub>12</sub>Im]<sub>2</sub>[Folate] in PBS**

**Z-Average (d.nm): 741,0**

**Pdl: 0,618**

**Intercept: 0,881**

**Result quality : Refer to quality report**

|                | Size (d.nm): | % Intensity: | St Dev (d.nm): |
|----------------|--------------|--------------|----------------|
| <b>Peak 1:</b> | 304,8        | 100,0        | 40,13          |
| <b>Peak 2:</b> | 0,000        | 0,0          | 0,000          |
| <b>Peak 3:</b> | 0,000        | 0,0          | 0,000          |

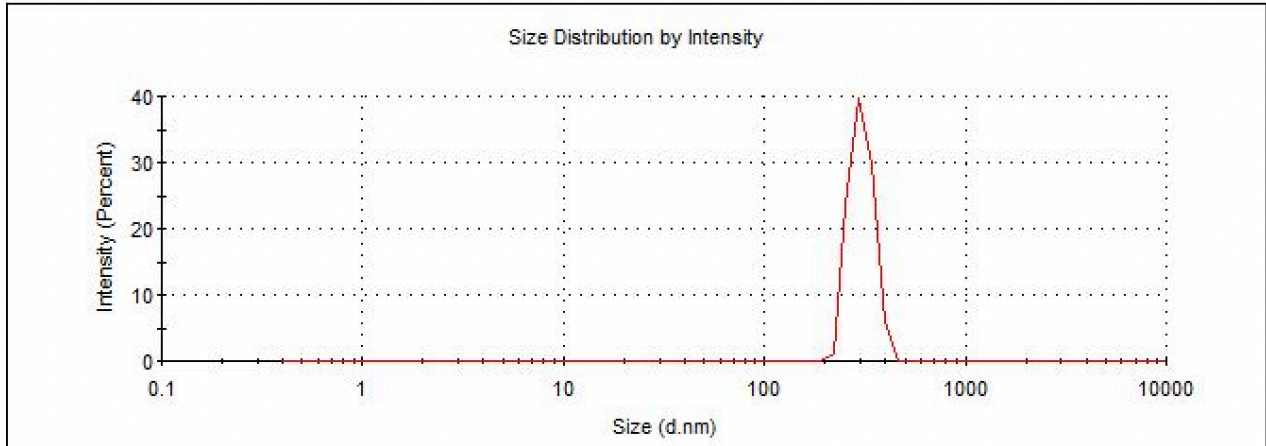

**[C<sub>1</sub>C<sub>12</sub>Im]<sub>2</sub>[Folate] in PBS/DMSO**

**Z-Average (d.nm): 979,3**

**Pdl: 0,494**

**Intercept: 0,666**

**Result quality : Refer to quality report**

|                | Size (d.nm): | % Intensity: | St Dev (d.nm): |
|----------------|--------------|--------------|----------------|
| <b>Peak 1:</b> | 661,5        | 100,0        | 123,6          |
| <b>Peak 2:</b> | 0,000        | 0,0          | 0,000          |
| <b>Peak 3:</b> | 0,000        | 0,0          | 0,000          |

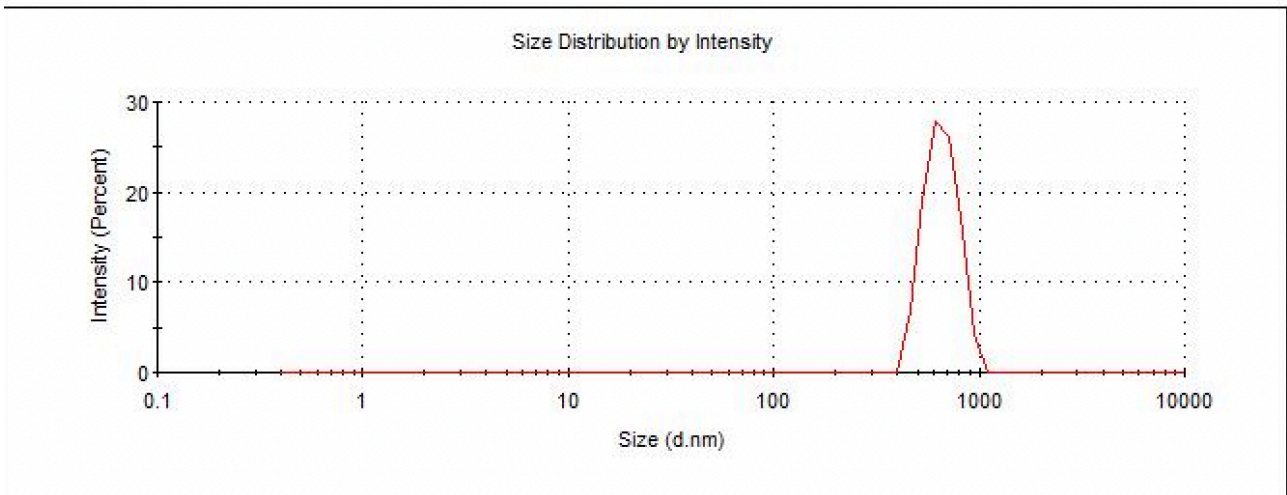



**[C<sub>1</sub>C<sub>12</sub>Im]<sub>2</sub>[Folate] in Tris**

|                                | Size (d.nm):         | % Intensity: | St Dev (d.nm): |
|--------------------------------|----------------------|--------------|----------------|
| <b>Z-Average (d.nm):</b> 929,1 | <b>Peak 1:</b> 387,3 | 100,0        | 46,90          |
| <b>Pdl:</b> 0,668              | <b>Peak 2:</b> 0,000 | 0,0          | 0,000          |
| <b>Intercept:</b> 0,885        | <b>Peak 3:</b> 0,000 | 0,0          | 0,000          |

**Result quality :** Refer to quality report

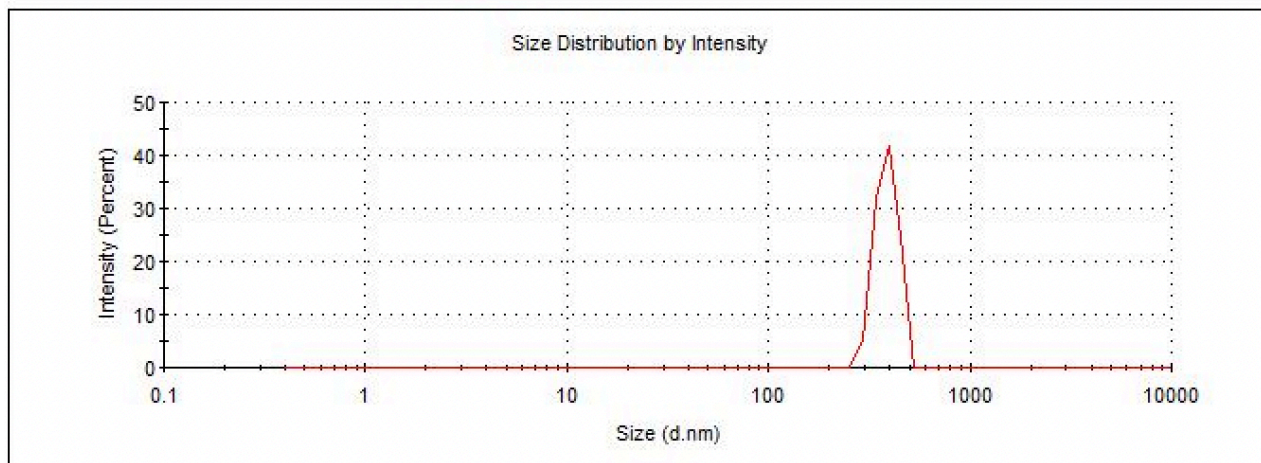**[C<sub>1</sub>C<sub>12</sub>Im]<sub>2</sub>[Folate] in Tris/DMSO**

|                                | Size (d.nm):         | % Intensity: | St Dev (d.nm): |
|--------------------------------|----------------------|--------------|----------------|
| <b>Z-Average (d.nm):</b> 646,3 | <b>Peak 1:</b> 398,7 | 100,0        | 64,00          |
| <b>Pdl:</b> 0,507              | <b>Peak 2:</b> 0,000 | 0,0          | 0,000          |
| <b>Intercept:</b> 0,716        | <b>Peak 3:</b> 0,000 | 0,0          | 0,000          |

**Result quality :** Refer to quality report

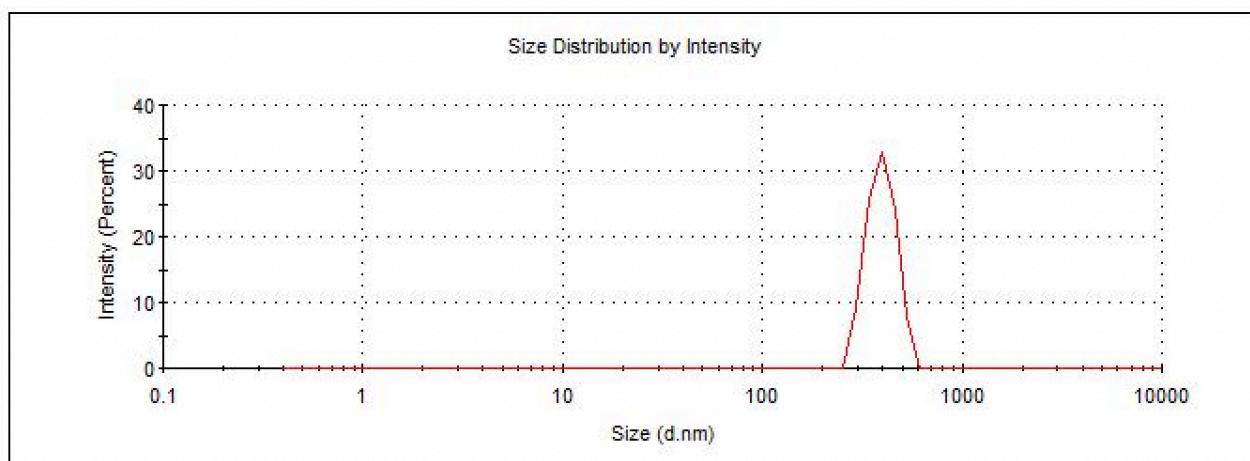

**Figure S7.** Apparent hydrodynamic diameter distribution functions obtained in buffer and buffer/DMSO for [C<sub>1</sub>C<sub>12</sub>Im]<sub>2</sub>[Folate] from DLS experiments.

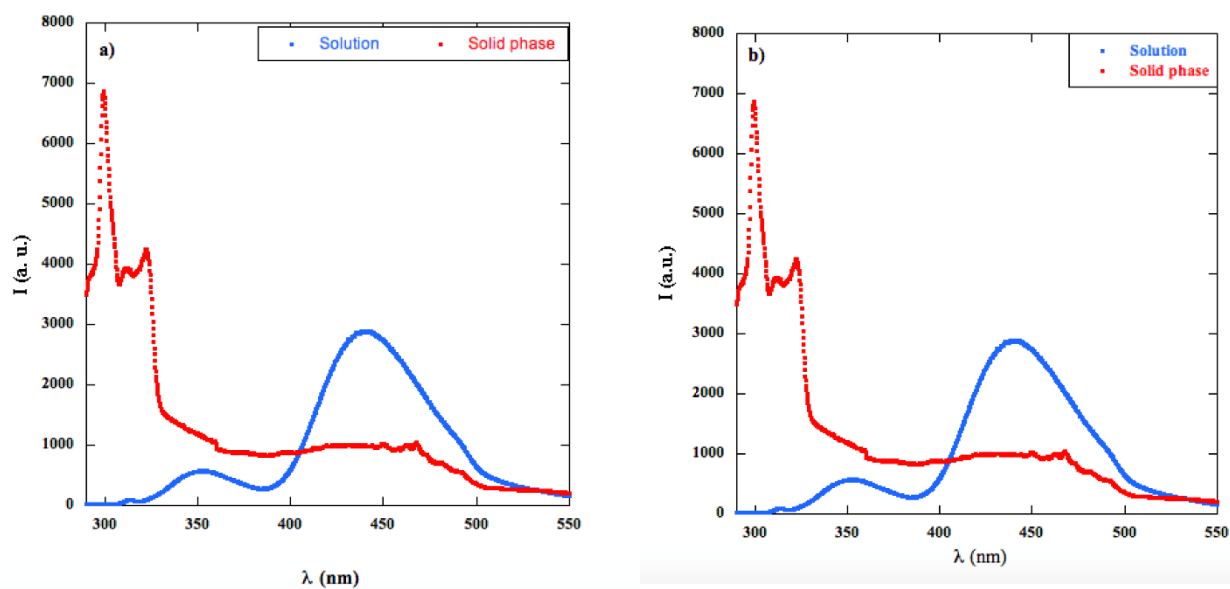

**Figure S8.** Superimposed fluorescence spectra, in PBS solution ( $3 \cdot 10^{-5}$  M) and solid phase, for **a)**  $[\text{Ch}]_2[\text{Folate}]$  and **b)**  $[\text{C}_{22}\text{C}_{12}\text{N}]_2[\text{Folate}]$ .

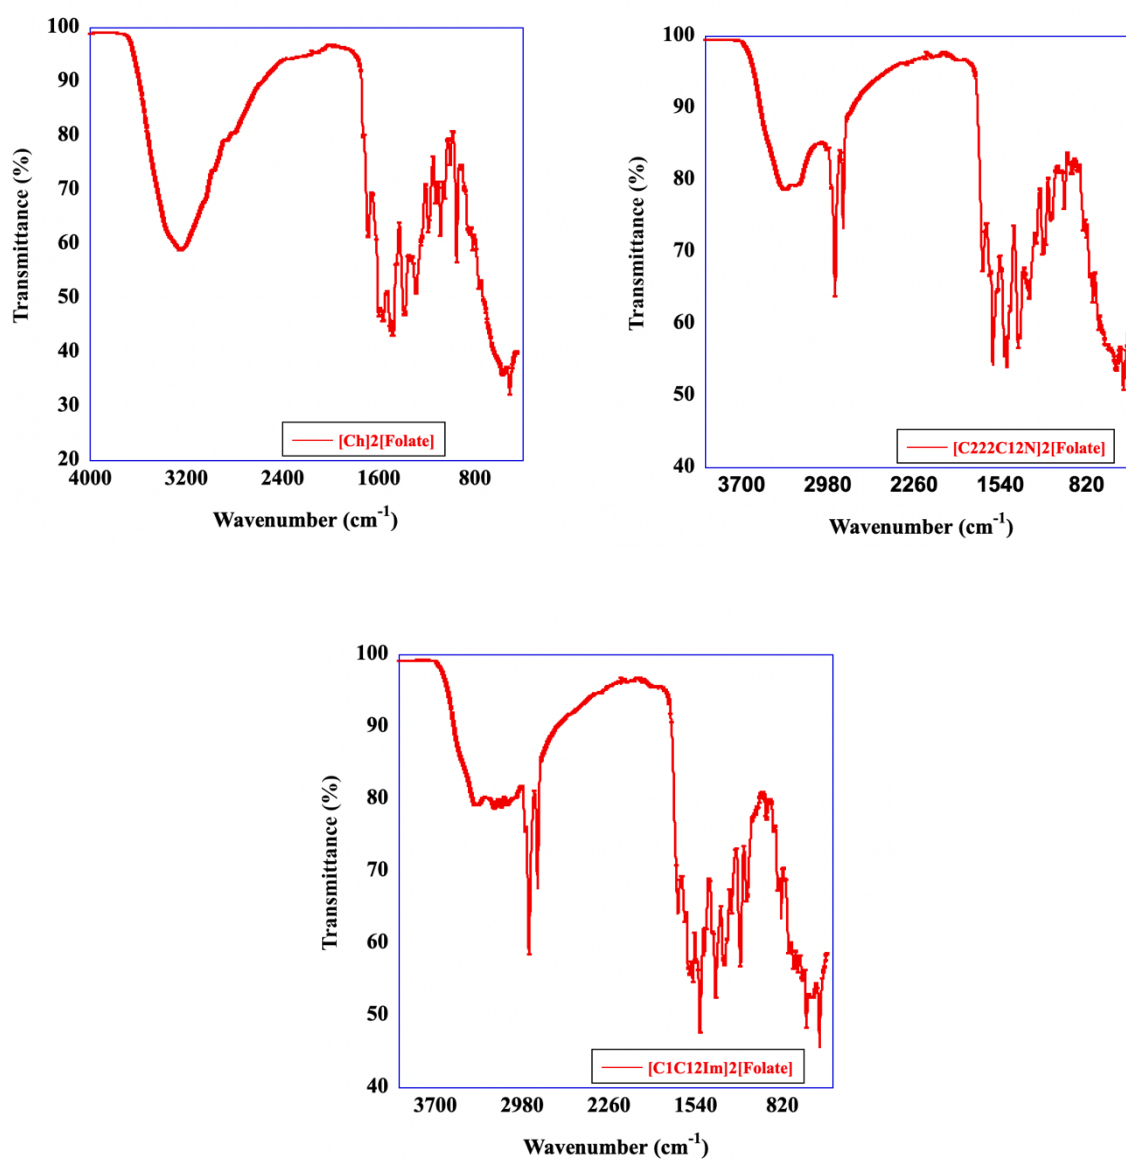

Figure S9. ATR-FTIR spectra of organic salts.

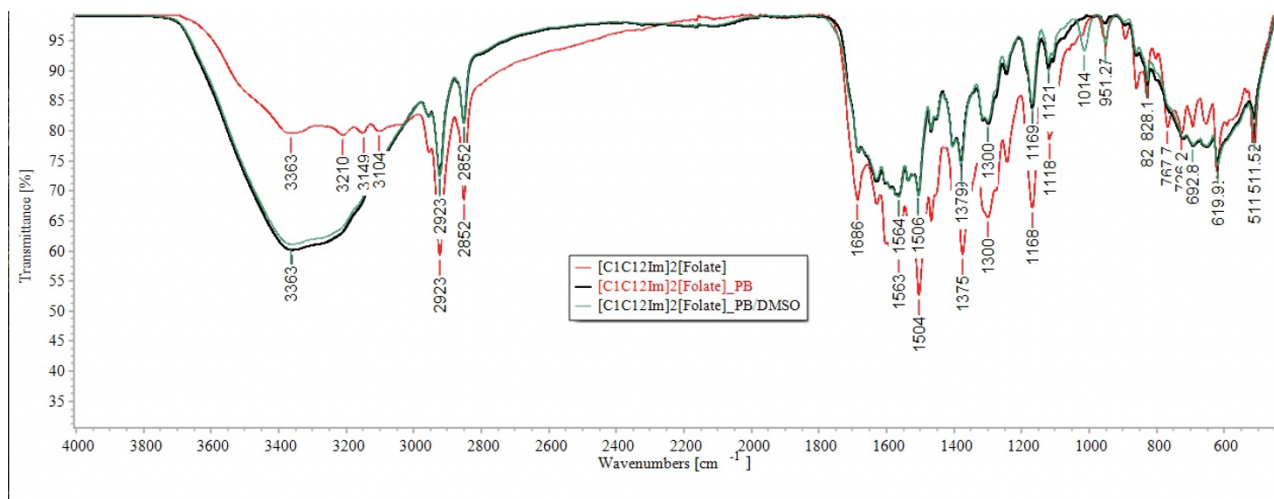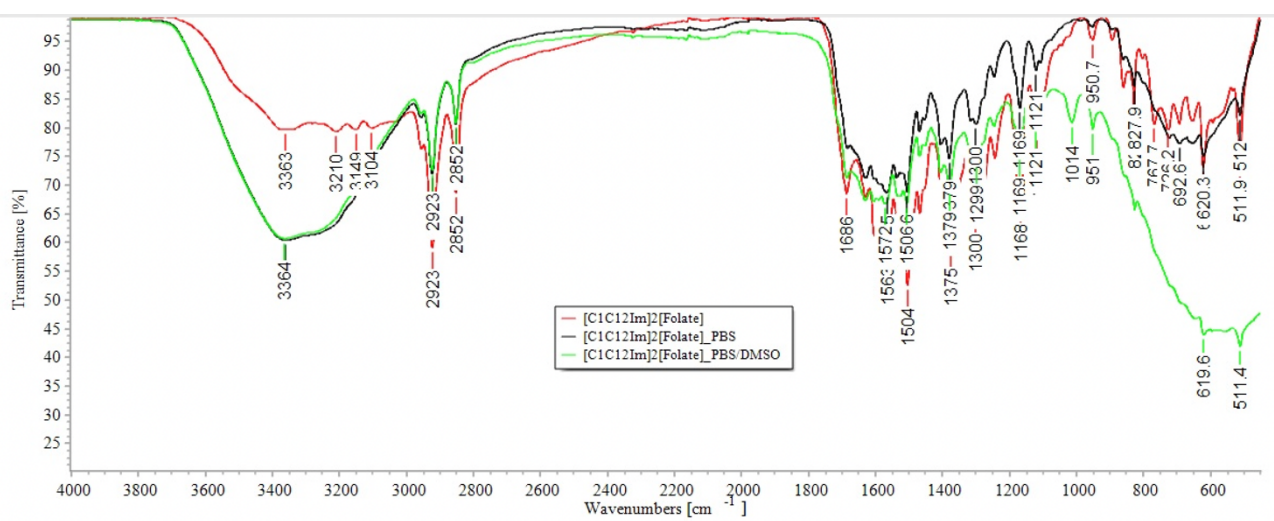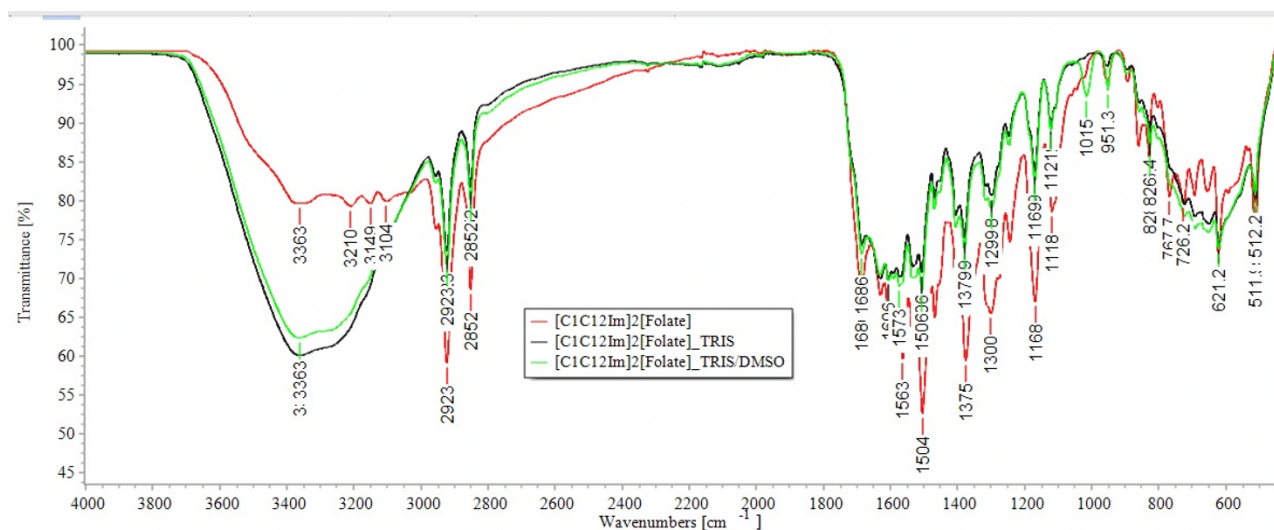

**Figure S10.** Superimposed ATR-FTIR spectra of [C<sub>1</sub>C<sub>12</sub>Im]<sub>2</sub>[Folate] and corresponding gel phases. IR spectra were plotted with Spectragryph.



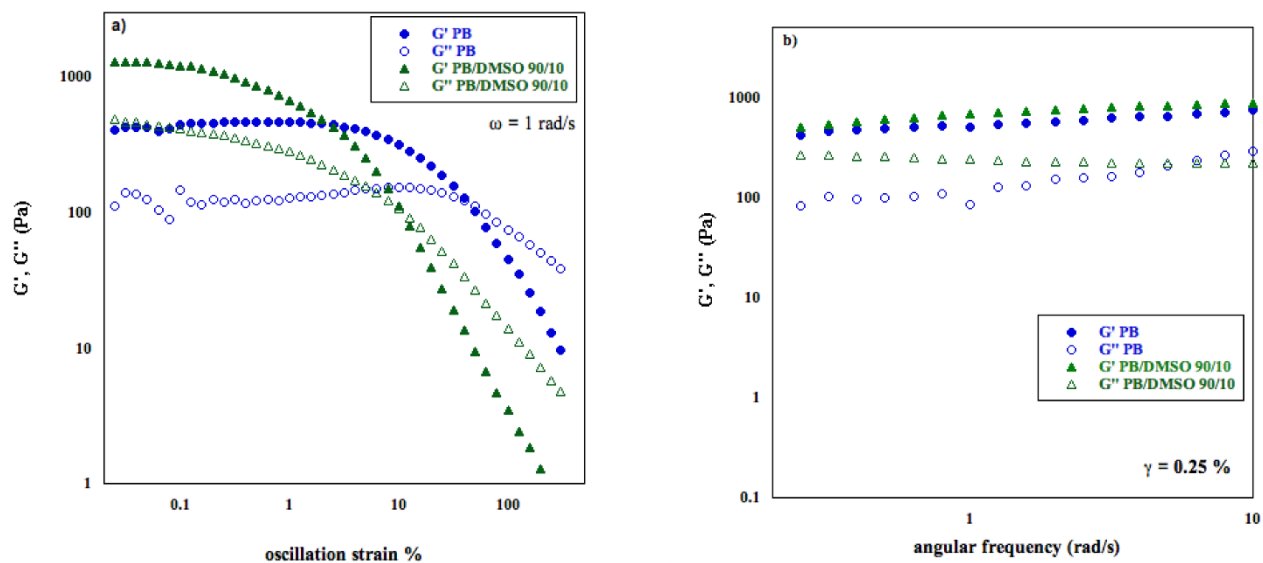

Figure S11. Strain and frequency sweeps of hydrogels formed by  $[\text{C}_{11}\text{C}_{12}\text{Im}]_2[\text{folate}]$ , in PB and PB/DMSO at 6 wt % .

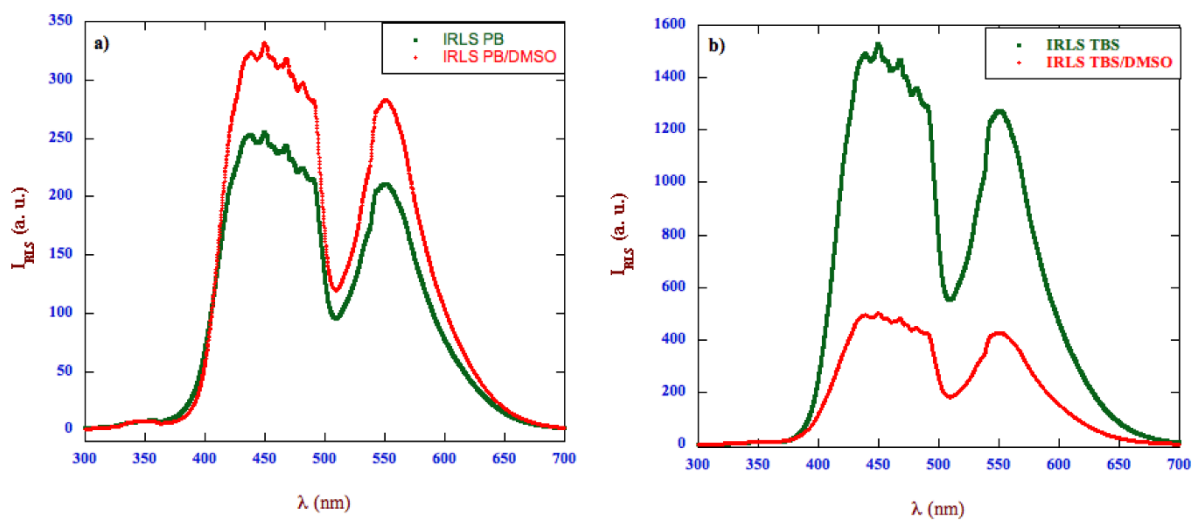

Figure S12. RLS Spectra of  $[\text{C}_{11}\text{C}_{12}\text{Im}]_2[\text{Folate}]$  solution ( $2.6 \cdot 10^{-4} \text{ M}$ ) in a) PB and PB/DMSO and b) TBS and TBS/DMSO.  $I_{\text{RLS}}$  at 450 nm, for different solutions at 450 nm, are displayed in Table 5.

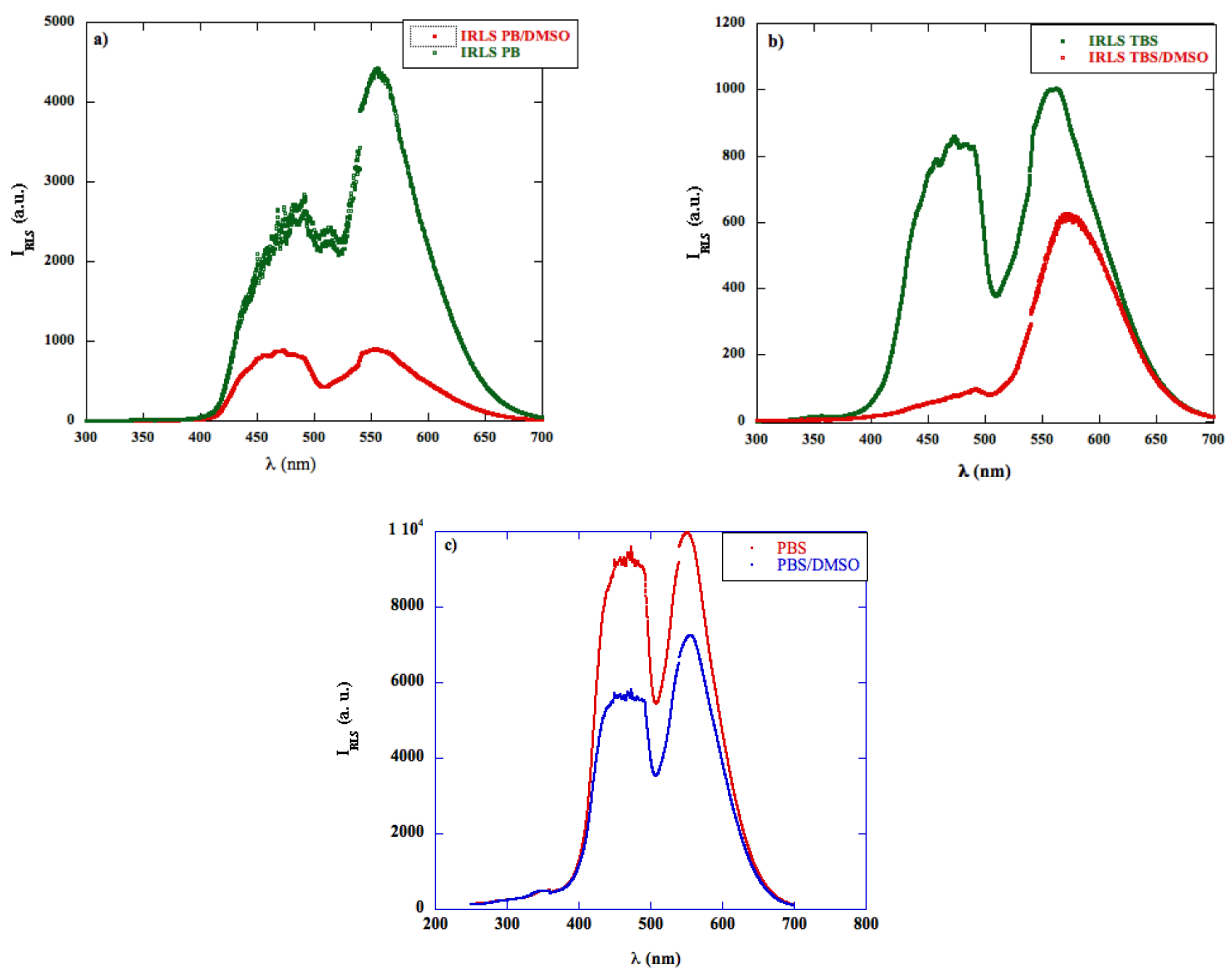

**Figure S13.** RLS Spectra of  $[C_{1}C_{12}Im]_{2}[Folate]$  gel at 6 wt % in **a)** PB and PB/DMSO and **b)** TBS and TBS/DMSO. IRLS at 470 nm are displayed in Table S5.

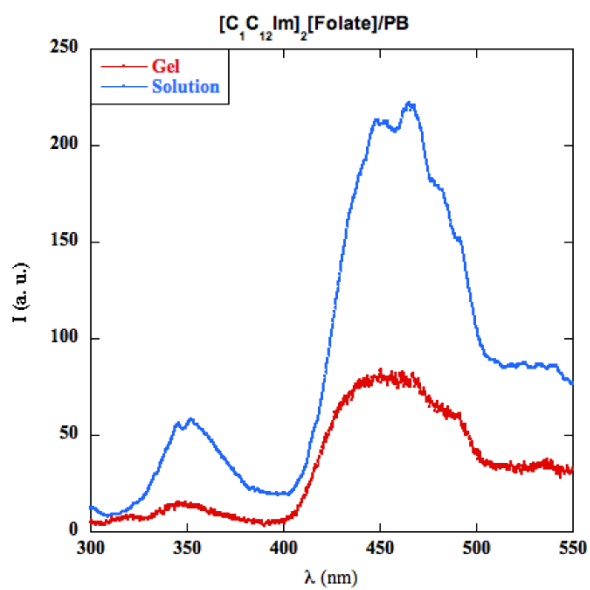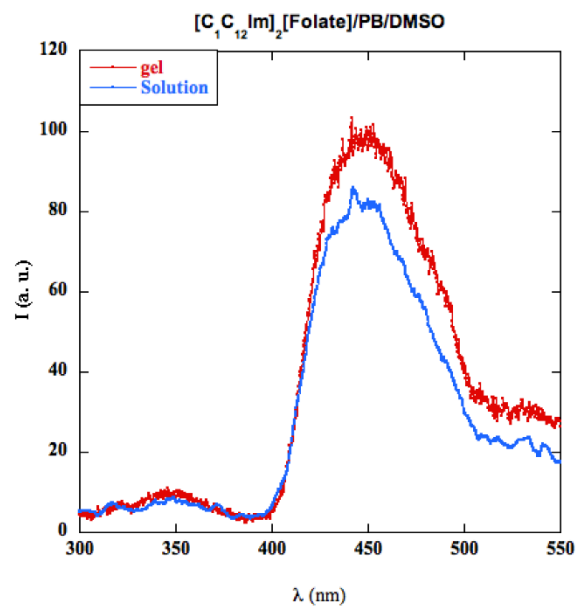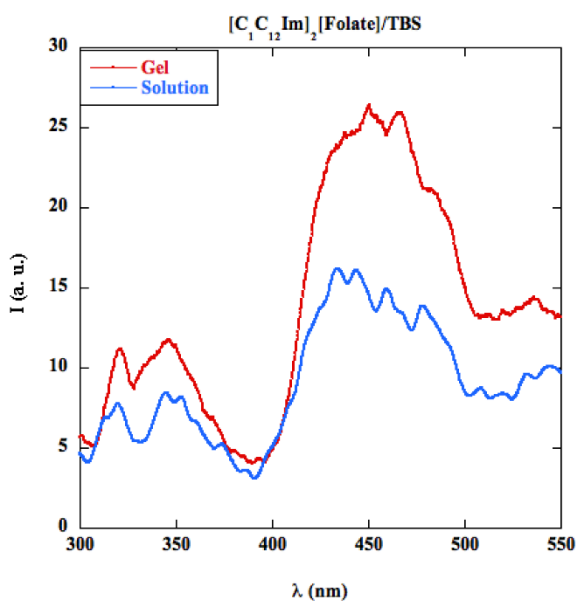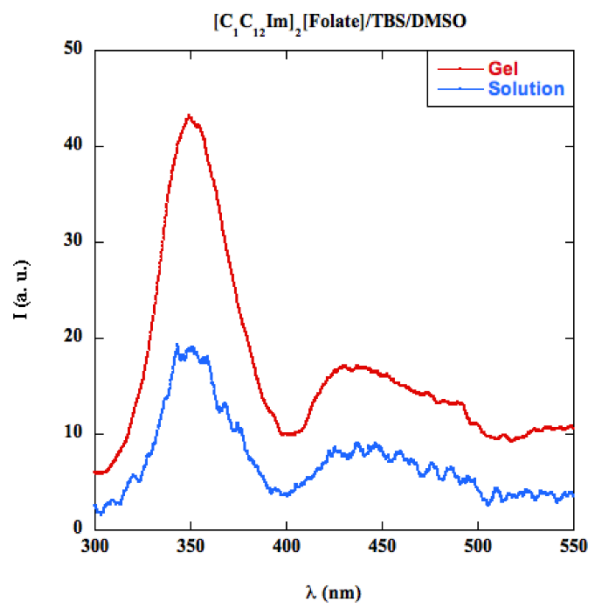

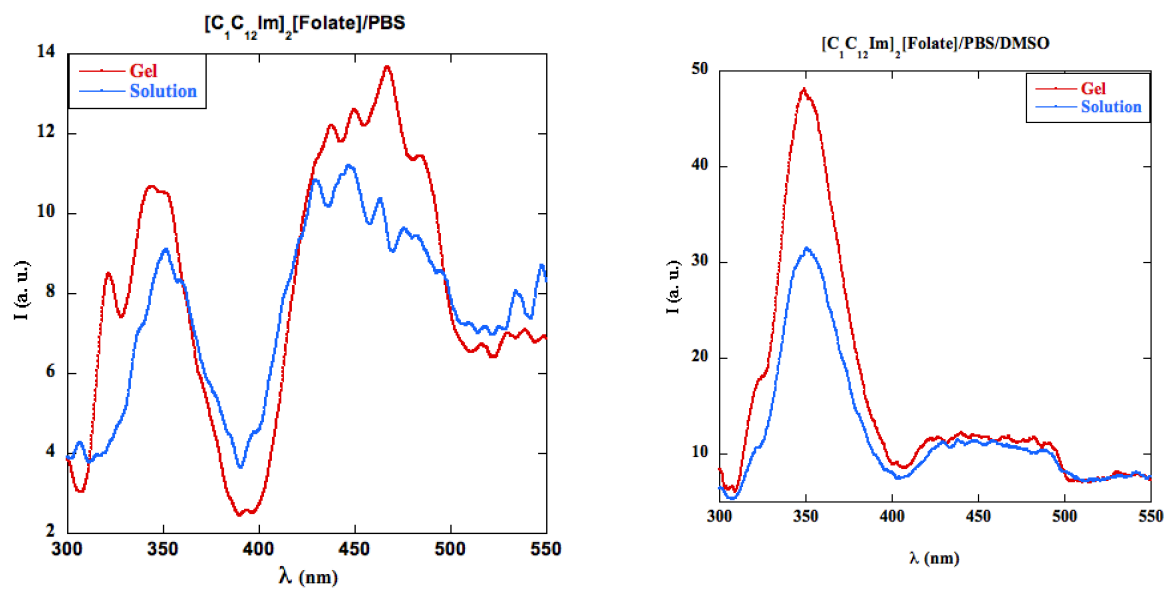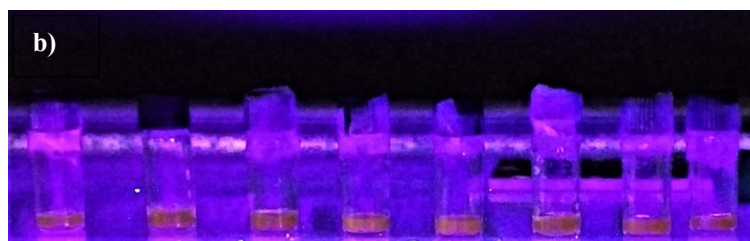

**Figure S14.** Fluorescence emission spectra of the hot solution and corresponding gel of  $[C_{12}Im]_2[Folate]$  at 6 wt %; **b)** Picture of  $[C_{12}Im]_2[Folate]$  gels irradiated at 365 nm.

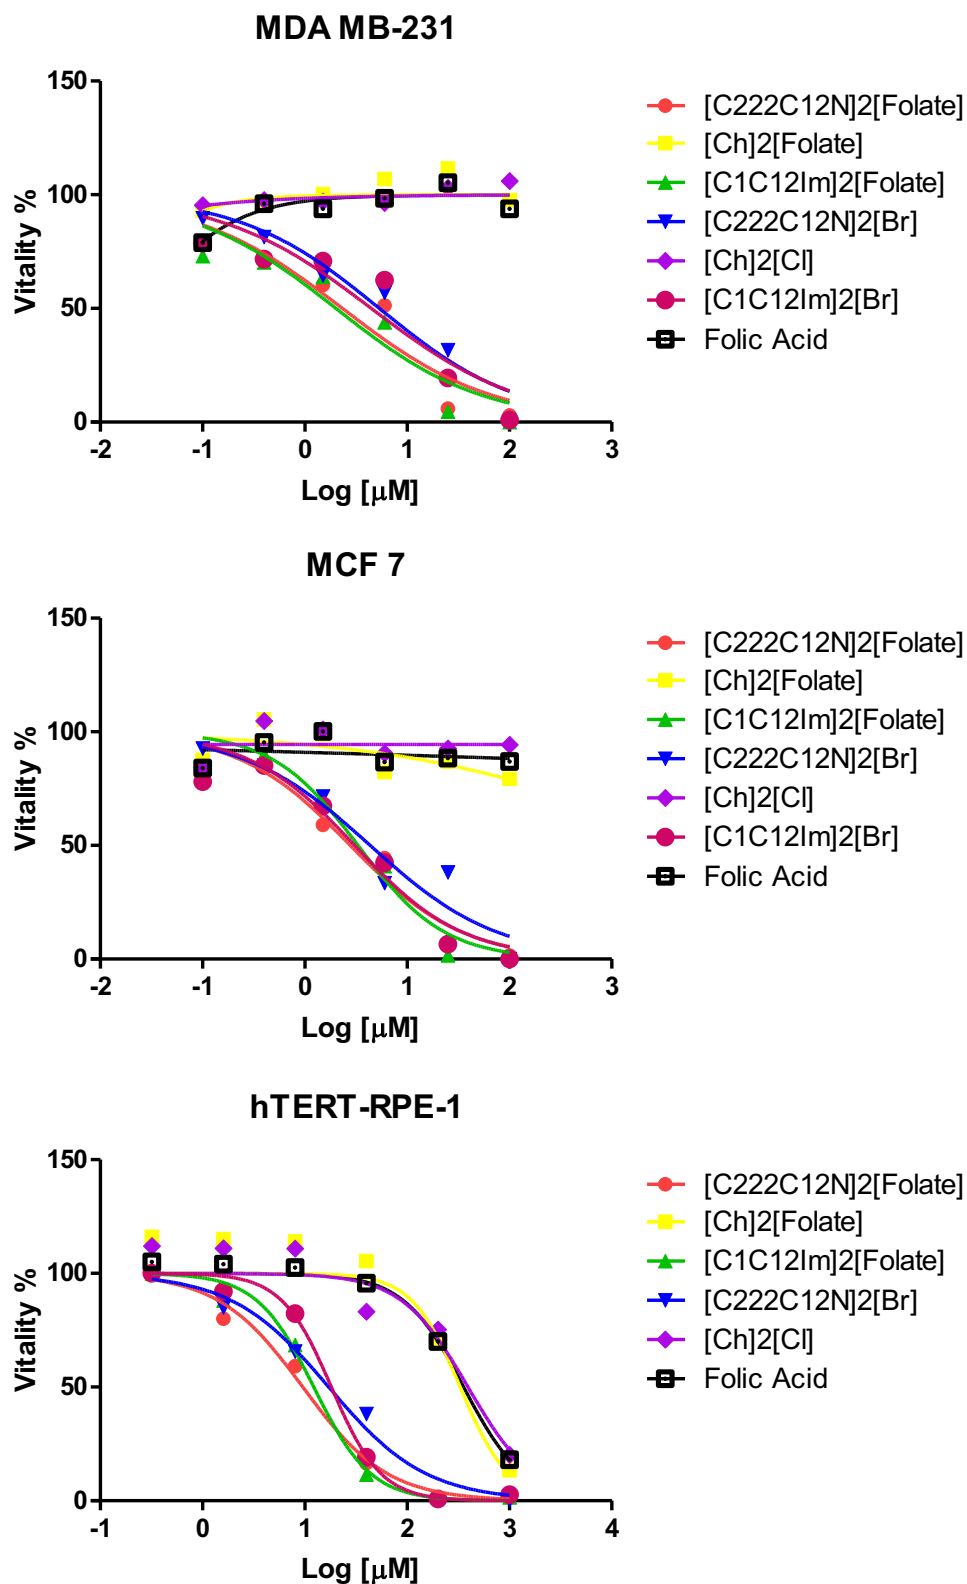

**Figure S15.** Sigmoidal cytotoxicity curves of treated MDA MB-231, MCF 7 and hTERT-RPE-1 cells for 24 h, obtained by plotting the cell percentage inhibition versus the logarithmic of salts concentration.

**A**

MDA-MB-231

**Control**

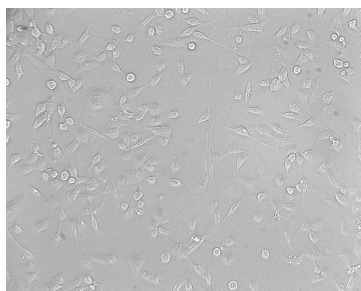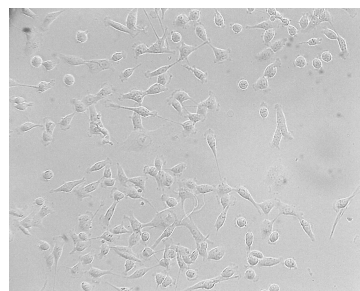

**Folic Acid**

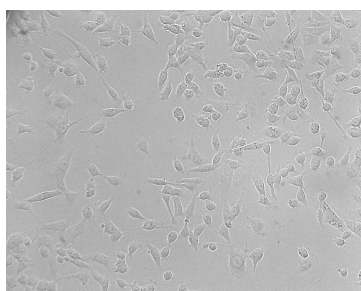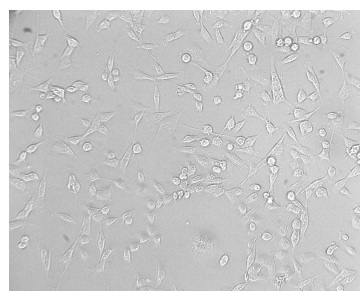

**[C<sub>222</sub>C<sub>12</sub>N]<sub>2</sub>[Folate]**

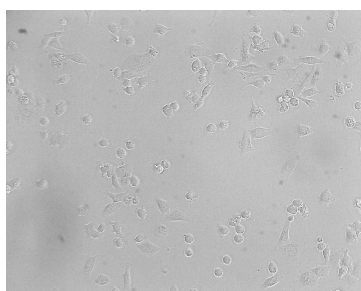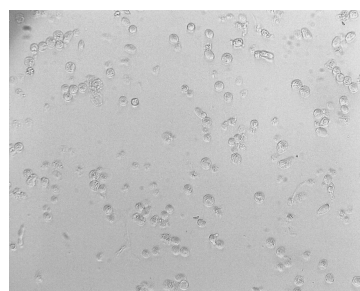

**[C<sub>1</sub>C<sub>12</sub>Im]<sub>2</sub>[Folate]**

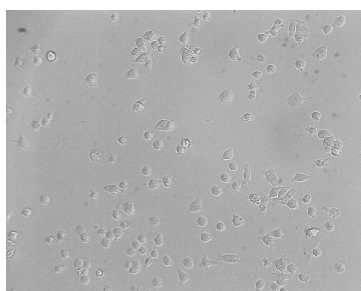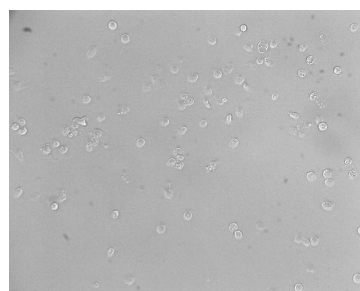

6 μM

25 μM

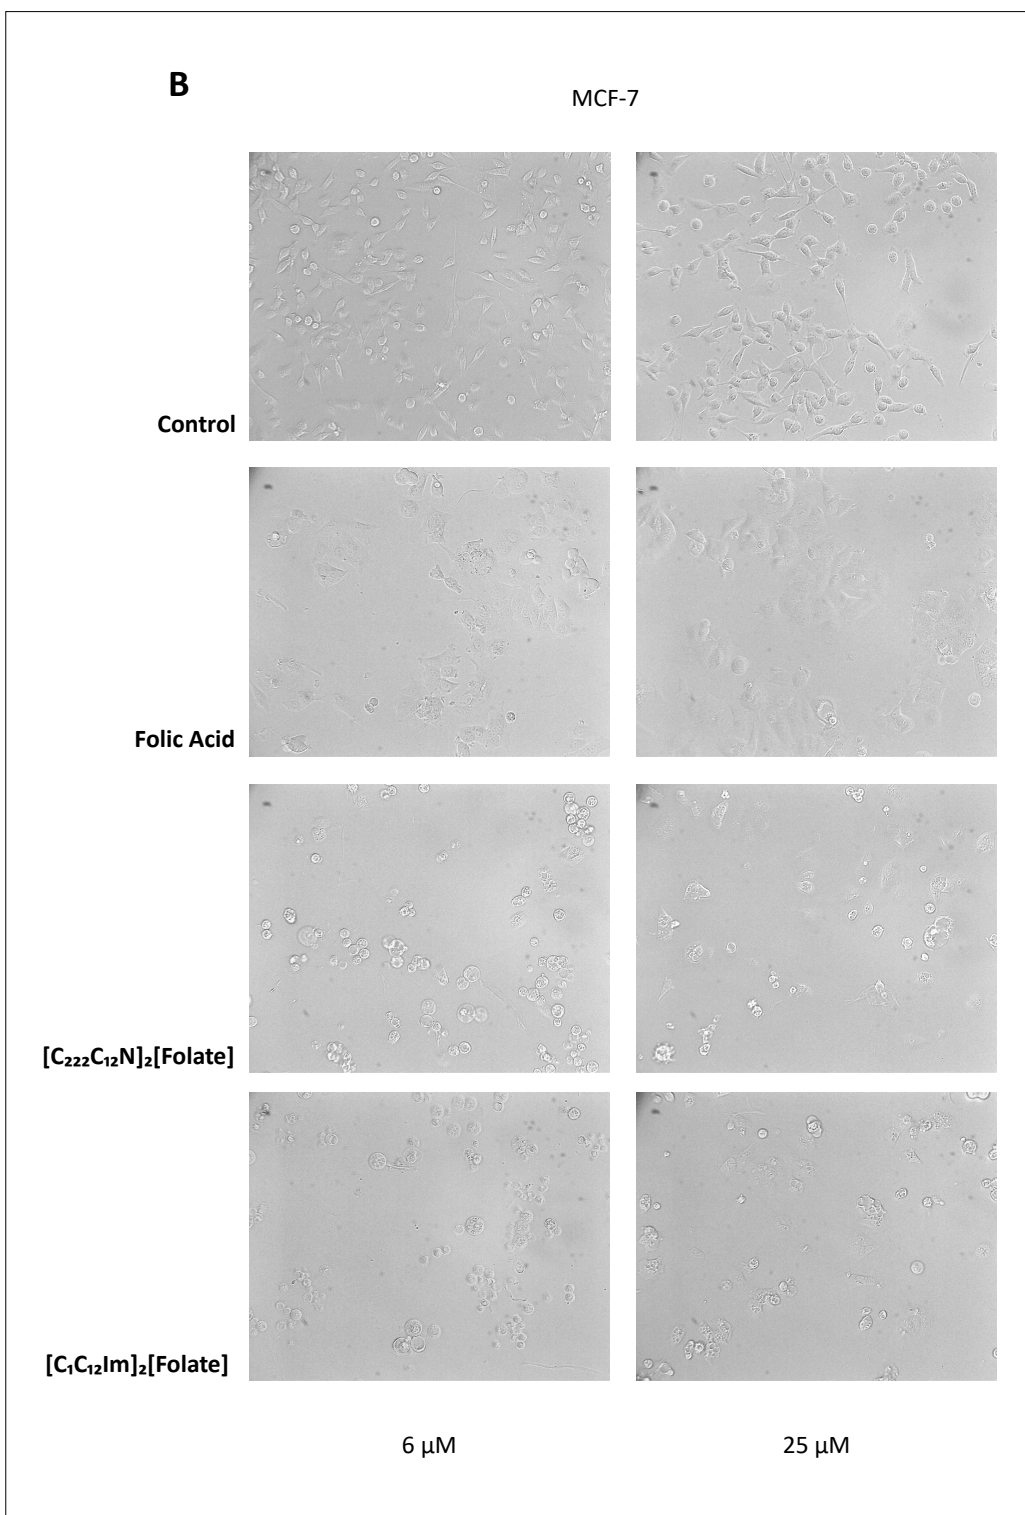

**Figure S16.** Inverted-phase contrast micrographs of MDA-MB-231 (A) and MCF-7 (B) cells treated for 24h with 6 and 25 μM of Folic Acid, [C<sub>222</sub>C<sub>12</sub>N]<sub>2</sub>[Folate] and [C<sub>1</sub>C<sub>12</sub>Im]<sub>2</sub>[Folate]. Magnification 100X.

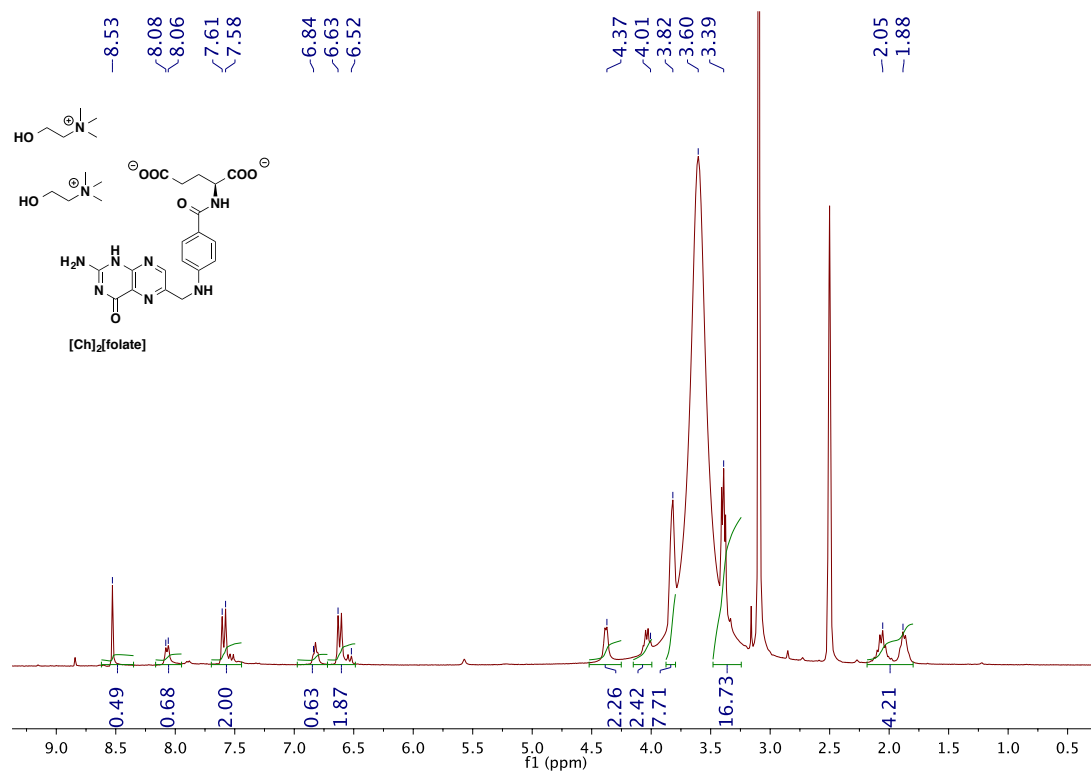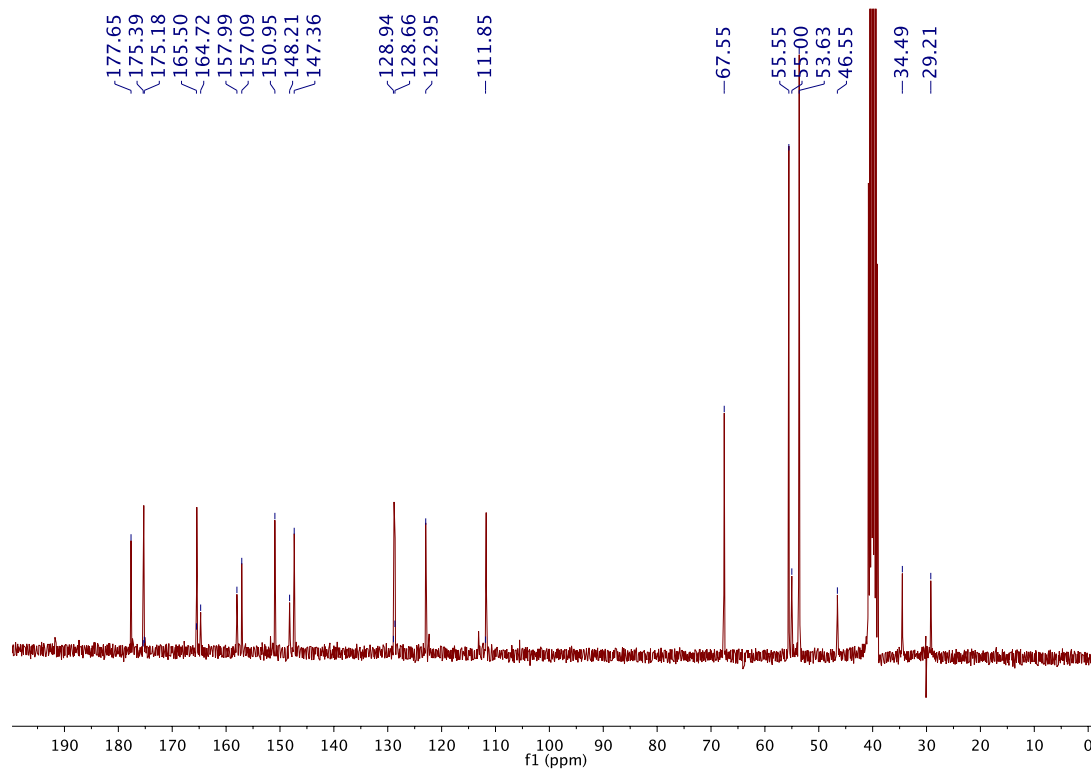

Spectra S1. NMR spectra of  $[\text{Ch}]_2[\text{folate}]$  in  $\text{DMSO-d}_6$ .



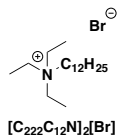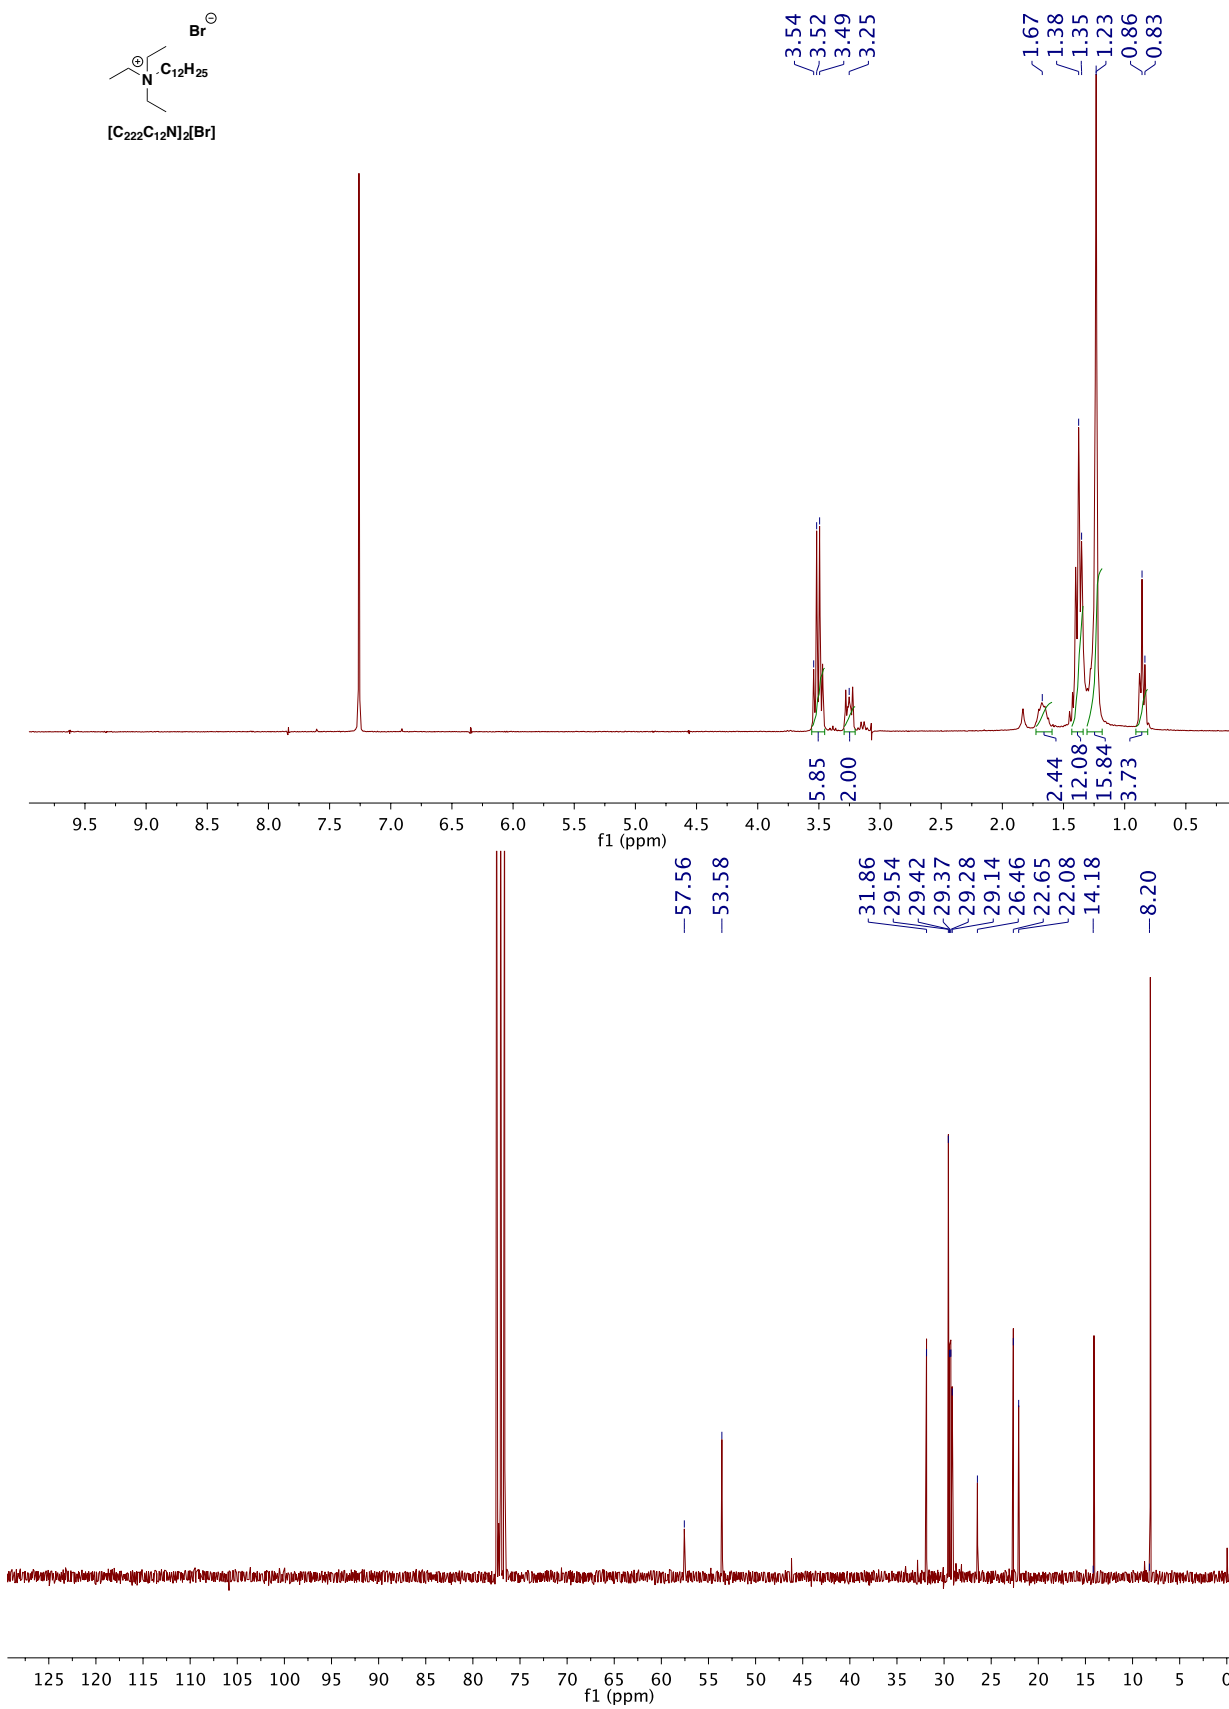

Spectra S2. NMR spectra of  $[\text{C}_{222}\text{C}_{12}\text{N}]_2\text{[Br]}$  in  $\text{CDCl}_3$ .

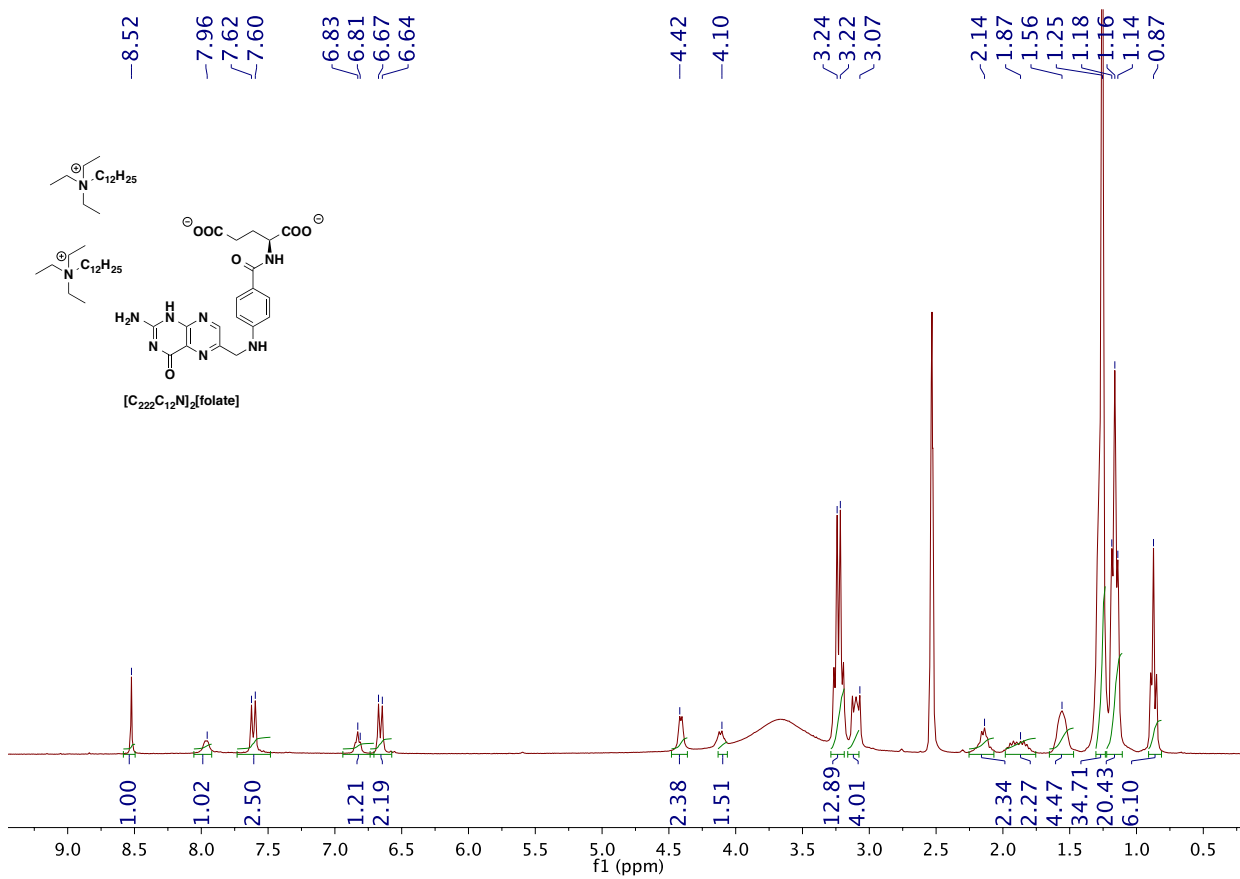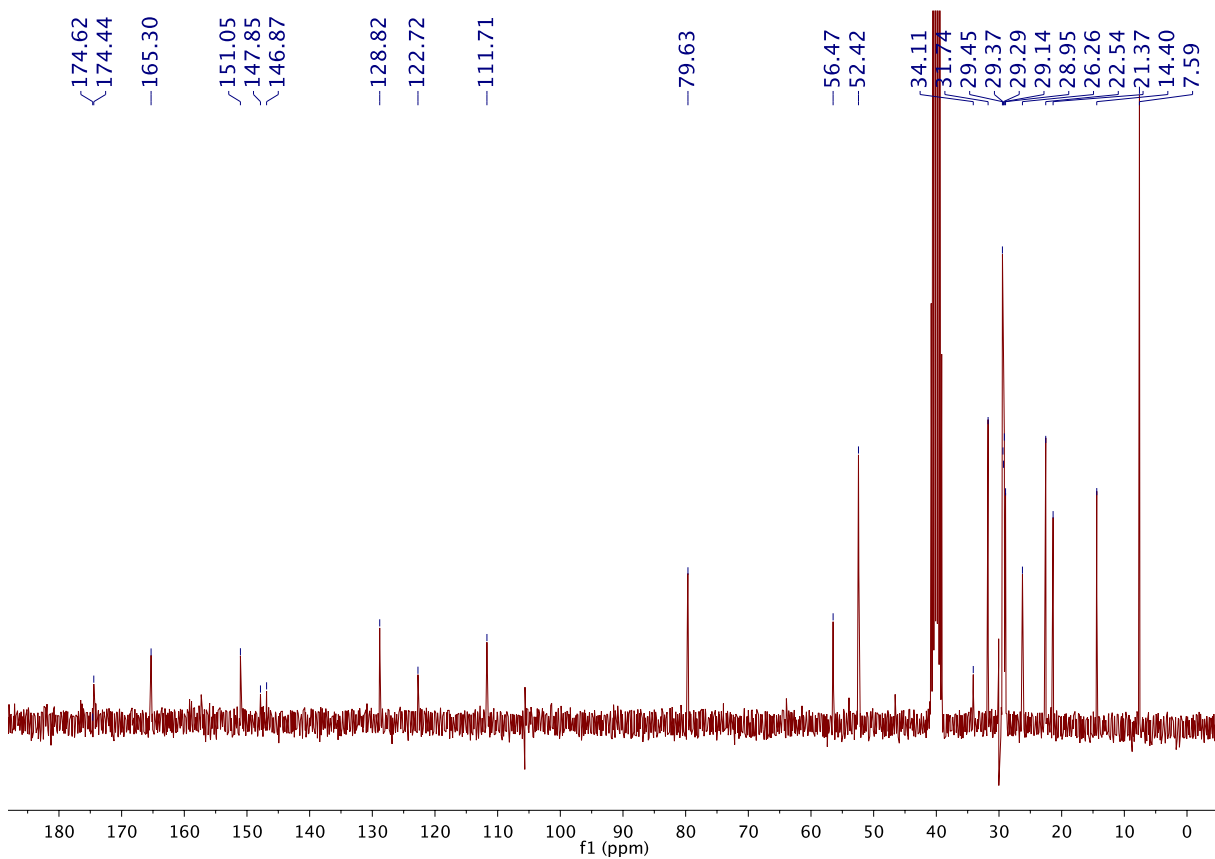

Spectra S3. NMR spectra of  $[C_{222}C_{12}N]_2[folate]$  in DMSO- $d_6$ .

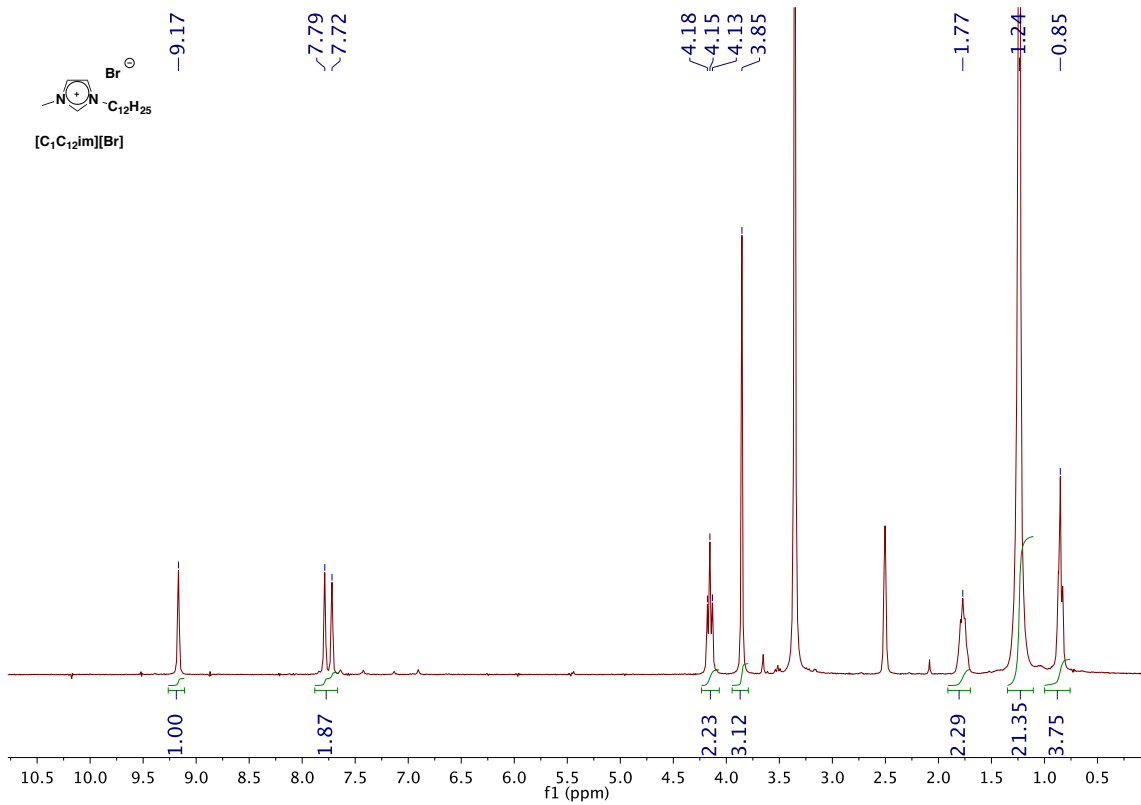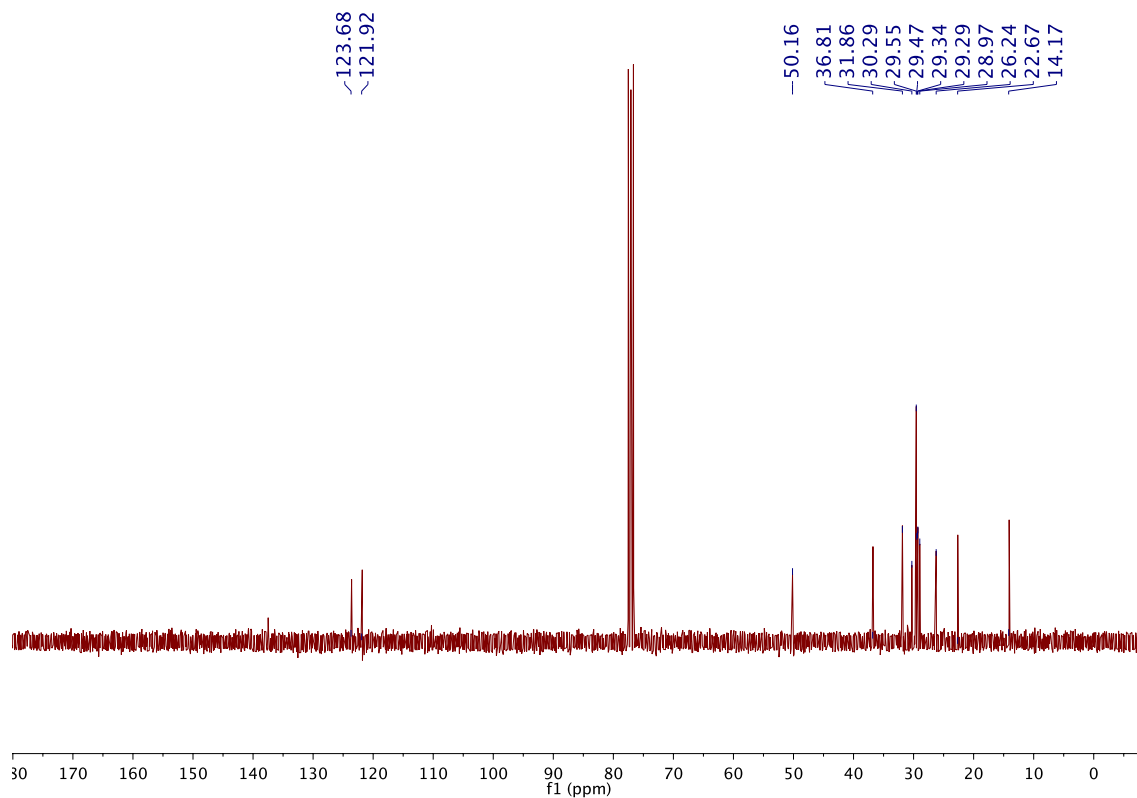

Spectra S4. NMR spectra of [C<sub>1</sub>C<sub>12</sub>im][Br] in DMSO-d<sub>6</sub>.



**Table S1.** UV-vis values of folate-salts ( $1 \cdot 10^{-4} \text{M}$ ) solution in PBS in presence of BSA at 2 and 40  $\mu\text{M}$ .

|                                                                                                 | $\lambda$ (nm) | Abs    |
|-------------------------------------------------------------------------------------------------|----------------|--------|
| <b>BSA (2<math>\mu\text{M}</math>)</b>                                                          | 277            | 0.0468 |
| <b>BSA (40<math>\mu\text{M}</math>)</b>                                                         | 277            | 0.3324 |
| <b>[Ch]<sub>2</sub> [Folate]</b>                                                                | 364            | 0.2169 |
| <b>[Ch]<sub>2</sub> [Folate] + BSA (2<math>\mu\text{M}</math>)</b>                              | 359 (max)      | 0.1317 |
|                                                                                                 | 364            | 0.1284 |
| <b>[Ch]<sub>2</sub> [Folate] + BSA (40<math>\mu\text{M}</math>)</b>                             | 351(max)       | 0.1417 |
|                                                                                                 | 364            | 0.1352 |
| <b>[C<sub>222</sub>C<sub>12</sub>N]<sub>2</sub> [Folate]</b>                                    | 356            | 0.1445 |
| <b>[C<sub>222</sub>C<sub>12</sub>N]<sub>2</sub> [Folate] + BSA (2<math>\mu\text{M}</math>)</b>  | 351 (max)      | 0.1603 |
|                                                                                                 | 356            | 0.1562 |
| <b>[C<sub>222</sub>C<sub>12</sub>N]<sub>2</sub> [Folate] + BSA (40<math>\mu\text{M}</math>)</b> | 346 (max)      | 0.3429 |
|                                                                                                 | 356            | 0.3234 |
| <b>[C<sub>1</sub>C<sub>12</sub>Im]<sub>2</sub> [Folate]</b>                                     | 366            | 0.1897 |
| <b>[C<sub>1</sub>C<sub>12</sub>Im]<sub>2</sub> [Folate] + BSA (2<math>\mu\text{M}</math>)</b>   | 366            | 0.2007 |
| <b>[C<sub>1</sub>C<sub>12</sub>Im]<sub>2</sub> [Folate] + BSA (40<math>\mu\text{M}</math>)</b>  | 365            | 0.1884 |

**Table S2.** Fluorescence values of folate-salts ( $1 \cdot 10^{-5}$ M) solution in PBS in presence of BSA at 2 and 40  $\mu$ M.

|                                                                                         | $\lambda_{max}$ (nm) | $I$     | $\lambda$ (nm) | $I$     |
|-----------------------------------------------------------------------------------------|----------------------|---------|----------------|---------|
| <b>BSA (2<math>\mu</math>M)</b>                                                         | 338                  | 548.194 |                |         |
| <b>BSA (40<math>\mu</math>M)</b>                                                        | 338                  | 1759.47 |                |         |
| <b>[Ch]<sub>2</sub>[Folate]</b>                                                         | 350                  | 70.0875 | 443.2          | 203.249 |
| <b>[Ch]<sub>2</sub>[Folate] + BSA (2<math>\mu</math>M)</b>                              | 342.2(max)           | 389.655 | 442            | 237.955 |
|                                                                                         | 350                  | 376.037 |                |         |
| <b>[Ch]<sub>2</sub>[Folate] + BSA (40<math>\mu</math>M)</b>                             | 337.6(max)           | 1215.47 | /              | /       |
| <b>[C<sub>222</sub>C<sub>12</sub>N]<sub>2</sub>[Folate]</b>                             | 350                  | 39.4114 | 442.2          | 298.942 |
| <b>[C<sub>222</sub>C<sub>12</sub>N]<sub>2</sub>[Folate] + BSA (2<math>\mu</math>M)</b>  | 339.2(max)           | 274.123 | 442.2          | 253.605 |
|                                                                                         | 350                  | 253.669 |                |         |
| <b>[C<sub>222</sub>C<sub>12</sub>N]<sub>2</sub>[Folate] + BSA (40<math>\mu</math>M)</b> | 339.2                | 1233.61 | /              | /       |
| <b>[C<sub>1</sub>C<sub>12</sub>Im]<sub>2</sub>[Folate]</b>                              | 350                  | 56.1259 | 442.2          | 341.233 |
| <b>[C<sub>1</sub>C<sub>12</sub>Im]<sub>2</sub>[Folate] + BSA (2<math>\mu</math>M)</b>   | 341.6(max)           | 307.155 | 442.2          | 322.754 |
|                                                                                         | 350                  | 291.555 |                |         |
| <b>[C<sub>1</sub>C<sub>12</sub>Im]<sub>2</sub>[Folate] + BSA (40<math>\mu</math>M)</b>  | 337.4                | 1213.36 | /              | /       |

**Table S3.** Apparent dynamic diameter ( $d_H$ ) and polydispersion index (PDI<sub>DLS</sub>) obtained from DLS measurements of [C<sub>1</sub>C<sub>12</sub>Im]<sub>2</sub>[Folate] in buffer and buffer/DMSO solution (0.0001 M).

| <b>Solvent</b> | <b><math>d_H</math> (nm)</b> | <b>PDI<sub>DLS</sub></b> |
|----------------|------------------------------|--------------------------|
| PB             | 650                          | 0.54                     |
| PB/DMSO        | 750                          | 0.58                     |
| PBS            | 740                          | 0.88                     |
| PBS/DMSO       | 980                          | 0.67                     |
| Tris           | 930                          | 0.67                     |
| Tris/DMSO      | 646                          | 0.72                     |

**Table S4.** Gelation tests.

| Solvent                                          | Folic acid          |                   | [C <sub>222</sub> C <sub>12</sub> N] <sub>2</sub> [folate] |                   | [Ch] <sub>2</sub> [folate] |                   | [C <sub>1</sub> C <sub>12</sub> Im] <sub>2</sub> [folate] |                   |
|--------------------------------------------------|---------------------|-------------------|------------------------------------------------------------|-------------------|----------------------------|-------------------|-----------------------------------------------------------|-------------------|
|                                                  | C(wt%) <sup>b</sup> | App. <sup>c</sup> | C(wt%) <sup>b</sup>                                        | App. <sup>c</sup> | C(wt%) <sup>b</sup>        | App. <sup>c</sup> | C(wt%) <sup>b</sup>                                       | App. <sup>c</sup> |
| H <sub>2</sub> O                                 | 0.2-2.0%            | <b>I</b>          | 2.0-3.8%                                                   | <b>S</b>          | 2.6-7.2%                   | <b>S</b>          | 0.5-5.4%                                                  | <b>I</b>          |
| DMSO                                             | 0.9-2.0%            | <b>S</b>          | 2.0%                                                       | <b>SC</b>         | 2.3-4.0%                   | <b>S</b>          | 2.0%                                                      | <b>SC</b>         |
| H <sub>2</sub> O/DMSO<br>(50/50) <sup>a</sup>    | 0.1-0.4%            | <b>G</b>          | /                                                          | /                 | 0.2-0.7%                   | <b>SC</b>         | /                                                         | /                 |
| H <sub>2</sub> O/DMSO<br>(90/10) <sup>a</sup>    | 0.3-2.3%            | <b>PS</b>         | 2.0-4.1%                                                   | <b>S</b>          | 2.2-4.8%                   | <b>SC</b>         | 1.8-4.0%                                                  | <b>P</b>          |
| TBS (1x)                                         | 0.3-1.1%            | <b>S</b>          | 2.1-2.9%                                                   | <b>PG</b>         | 2.6%                       | <b>SC</b>         | 0.5-6.4%                                                  | <b>G</b>          |
| TBS (1x)/DMSO<br>(50/50) <sup>a</sup>            | 0.2-0.5%            | <b>S</b>          | 1.9%                                                       | <b>S</b>          | 2.5-4.2%                   | <b>S</b>          | 2.4%                                                      | <b>P</b>          |
| TBS (1x)/DMSO<br>(90/10) <sup>a</sup>            | /                   | /                 | 1.9-3.9%                                                   | <b>S</b>          | /                          | /                 | 2.2-6.1%                                                  | <b>G</b>          |
| PB                                               | 1.0 - 2.0%          | <b>P</b>          | 2.0-7.3%                                                   | <b>S</b>          | 3.5-7.1%                   | <b>S</b>          | 2.2-6.0%                                                  | <b>G</b>          |
| PB/DMSO<br>(50/50) <sup>a</sup>                  | 0.3-0.5%            | <b>S</b>          | 1.9%                                                       | <b>SF</b>         | 2.0-4.0%                   | <b>S</b>          | 2.0%                                                      | <b>S</b>          |
| PB/DMSO<br>(90/10) <sup>a</sup>                  | /                   | /                 | 2.0-3.9%                                                   | <b>S</b>          | /                          | /                 | 2.3-6.1%                                                  | <b>G</b>          |
| PBS (1x)                                         | /                   | /                 | 4.0%                                                       | <b>S</b>          | 3.9%                       | <b>S</b>          | 4.1-5.9%                                                  | <b>G</b>          |
| PBS (1x)/DMSO<br>(90/10) <sup>a</sup>            | /                   | /                 | 3.7%                                                       | <b>S</b>          | 3.8%                       | <b>SC</b>         | 5.0-6.0%                                                  | <b>G</b>          |
| PBS (10x)                                        | 0.2-0.3%            | <b>P</b>          | 2.1-6.9%                                                   | <b>PG</b>         | 1.9-9.5%                   | <b>SC</b>         | 0.5-4.9%                                                  | <b>I</b>          |
| PBS (10x)/DMSO<br>(50/50) <sup>a</sup>           | 0.2-0.7%            | <b>P</b>          | 1.9-4.8%                                                   | <b>P</b>          | 1.8-4.4%                   | <b>S</b>          | 2.0%                                                      | <b>P</b>          |
| PBS (10x)/DMSO<br>(90/10) <sup>a</sup>           | 0.2%                | <b>S</b>          | 2.0-4.0%                                                   | <b>S</b>          | /                          | /                 | 2.2-4.0%                                                  | <b>I</b>          |
| Ethanol                                          | 0.1-2.2%            | <b>I</b>          | 2.0%                                                       | <b>S</b>          | 0.2-2.5%                   | <b>I</b>          | 2.0%                                                      | <b>S</b>          |
| H <sub>2</sub> O/Ethanol<br>(50/50) <sup>a</sup> | 0.2%                | <b>S</b>          | 2.3-4.8%                                                   | <b>S</b>          | 0.2%                       | <b>SC</b>         | 2.1-4.0%                                                  | <b>P</b>          |
| Glycerol                                         | 0.2 -2.0%           | <b>P</b>          | 2.0-6.6%                                                   | <b>S</b>          | 2.9-6.7%                   | <b>PG</b>         | 2.0-4.0%                                                  | <b>PG</b>         |
| Dioxolane                                        | 0.4%                | <b>P</b>          | /                                                          | /                 | 2.3%                       | <b>I</b>          | /                                                         | /                 |
| 1,3-Propanediol                                  | 0.2%                | <b>I</b>          | /                                                          | /                 | 2.0-8.4%                   | <b>S</b>          | /                                                         | /                 |

<sup>a</sup> volume ratio (v/v); <sup>b</sup>C=concentration range analyzed (g gelator/g solution); <sup>c</sup>App. = appearance: **I** (insoluble), **G** (gel), **PG** (partial gel), **PS** (partially soluble), **P** (precipitate), **SC** (soluble at room temperature), **S** (soluble after heating and cooling of solution).

**Table S5.** I<sub>RLS</sub> at 470 nm for [C<sub>1</sub>C<sub>12</sub>Im]<sub>2</sub>[Folate] gel phases formed in buffer and buffer/DMSO binary mixtures.

| gels                                                                       | I <sub>470 nm</sub> |
|----------------------------------------------------------------------------|---------------------|
| [C <sub>1</sub> C <sub>12</sub> Im] <sub>2</sub> [folate] in PB            | 2160                |
| [C <sub>1</sub> C <sub>12</sub> Im] <sub>2</sub> [folate] in PB/DMSO 90/10 | 890                 |
| [C <sub>1</sub> C <sub>12</sub> Im] <sub>2</sub> [folate] in PBS           | 9370                |
| C <sub>1</sub> C <sub>12</sub> Im] <sub>2</sub> [folate] in PBS            | 5680                |
| [C <sub>1</sub> C <sub>12</sub> Im] <sub>2</sub> [folate] in TBS           | 840                 |
| [C <sub>1</sub> C <sub>12</sub> Im] <sub>2</sub> [folate] in TBS/DMSO      | 75                  |

## References

1. F. Menges, *Spectragryph- optical spectroscopy software -Version 1.2.16.1*
